1 **Title:** Connectomic analysis reveals an interneuron with an integral role in the retinal circuit for  
2 night vision

3

4 **Authors:** Silvia J.H. Park<sup>1\*</sup>, Evan M. Lieberman<sup>2\*</sup>, Jiang-Bin Ke<sup>2</sup>, Nao Rho<sup>2</sup>, Padideh Ghorbani<sup>2</sup>,  
5 Pouyan Rahmani<sup>1</sup>, Na Young Jun<sup>1</sup>, Hae-Lim Lee<sup>4</sup>, In-Jung Kim<sup>1</sup>, Kevin L. Briggman<sup>3</sup>, Jonathan  
6 B. Demb<sup>1,4,5,6</sup>, Joshua H. Singer<sup>2,6</sup>

7

8 <sup>1</sup> Department of Ophthalmology & Visual Science, Yale University, New Haven, CT 06511

9 <sup>2</sup> Department of Biology, University of Maryland, College Park, MD 20742

10 <sup>3</sup> Circuit Dynamics and Connectivity Unit, National Institute of Neurological Disorders and  
11 Stroke, National Institutes of Health, Bethesda, MD 20892 USA

12 <sup>4</sup> Department of Cellular & Molecular Physiology, Yale University, New Haven, CT 06511

13 <sup>5</sup> Department of Neuroscience, Yale University, New Haven, CT 06511

14 <sup>6</sup> Correspondence: [jhsinger@umd.edu](mailto:jhsinger@umd.edu) (lead contact) and [jonathan.demb@yale.edu](mailto:jonathan.demb@yale.edu)

15 \* denotes equal contributions

16

17 **Acknowledgements:** Supported by EY017836 to JHS, EY014454 to JBD, EY029820 to I-JK,  
18 P30-EY026878 to Yale University, and an unrestricted grant from Research to Prevent  
19 Blindness to Yale University. We thank Tim Maugel and the Laboratory for Biological  
20 Ultrastructure (Department of Biology, UMD) for assistance with transmission electron  
21 microscopy, Alexander Baden for assistance with 3D visualization, and Kacie Furcolo and Adit  
22 Sabnis for assistance with SBEM dataset skeletonization. We thank Cole Graydon for  
23 comments on the manuscript.

24

25 **Author Contributions:** Conceptualization, JBD and JHS; Methodology, KLB; Software, KLB  
26 and NR; Formal Analysis, ELM and SP; Investigation, PG, NYJ, ELM, PR, and SP; Resources,  
27 HL, KLB; Writing – Original Draft, Review, and Editing JBD and JHS; Supervision, JBD, I-JK,  
28 JHS

29

30 **Declaration of Interests:** The authors declare no competing interests.

31 **Summary**

32 The mammalian rod bipolar (RB) cell pathway is perhaps the best-studied circuit in the  
33 vertebrate retina. Its synaptic interactions with other retinal circuits, however, remain  
34 unresolved. Here, we combined anatomical and physiological analyses of the mouse retina to  
35 discover that the majority of synaptic inhibition to the All amacrine cell (AC), the central neuron  
36 in the RB pathway, is provided by a single interneuron type: a multistratified, axon-bearing  
37 GABAergic AC, with dendrites in both ON and OFF synaptic layers, but with a pure ON  
38 (depolarizing) response to light. We used the nNOS-CreER mouse retina to confirm the identity  
39 of this interneuron as the wide-field NOS-1 AC. Our study demonstrates generally that novel  
40 neural circuits can be identified from targeted connectomic analyses and specifically that the  
41 NOS-1 AC mediates long-range inhibition during night vision and is a major element of the RB  
42 pathway.

43

## 44 Introduction

45 In dim light, vision originates with rod photoreceptors. In mammals, rod output is conveyed to  
46 ganglion cells (GCs), the retinal projection neurons, by the rod bipolar (RB) cell pathway (Demb  
47 and Singer, 2015; Famiglietti and Kolb, 1975; Field et al., 2005) (Figure 1). Absorption of  
48 photons by rods depolarizes RBs, which therefore are ON cells. RBs make dyad synapses with  
49 A17 amacrine cells (ACs) and All ACs: A17s provide feedback inhibition to the RB [akin to  
50 dendro-dendritic inhibition in the olfactory bulb (Isaacson and Strowbridge, 1998; Jahr and  
51 Nicoll, 1980, 1982)], and Alls provide feedforward signals that simultaneously drive excitation  
52 and inhibition in ON and OFF GCs, respectively (Murphy and Rieke, 2006; Strettoi et al., 1994;  
53 Strettoi et al., 1992).

54 Three GC types in the mouse retina receive input from the RB pathway at or near visual  
55 threshold: the ON  $\alpha$  GC and the OFF  $\alpha$  and  $\delta$  GCs, which exhibit high sensitivity to spatial  
56 contrast in the visual scene—similar to primate parasol cells—and project to the geniculo-  
57 cortical pathway (Ala-Laurila et al., 2011; Ala-Laurila and Rieke, 2014; Dunn et al., 2006;  
58 Grimes et al., 2018a; Grimes et al., 2015; Grimes et al., 2014b; Grimes et al., 2018b; Ke et al.,  
59 2014; Kuo et al., 2016; Murphy and Rieke, 2006, 2008). Input from the RB pathway to ON  $\alpha$   
60 GCs provides the signal that guides behavior at visual threshold (Smeds et al., 2019).

61 Signaling from Alls to ON and OFF pathways is compartmentalized by the morphology of the  
62 All, which is a bistratified cell with distinct neurites in the ON and OFF sublaminae of the inner  
63 plexiform layer (IPL; Figure 1). The distal (ON-layer) dendrites receive excitatory input from RBs  
64 and make electrical synapses with the axon terminals of ON cone bipolar (CB) cells, particularly  
65 type 6 CBs presynaptic to ON  $\alpha$  GCs; depolarization of Alls drives excitatory transmission to ON  
66  $\alpha$  GCs (Schwartz et al., 2012). The proximal (OFF-layer) dendrites make inhibitory glycinergic  
67 synapses onto the axon terminals of some OFF CBs [primarily type 2 CBs (Graydon et al.,  
68 2018)] and some OFF GCs, including OFF  $\alpha$  and  $\delta$  GCs as well as suppressed-by-contrast GCs  
69 (Beaudoin et al., 2019; Demb and Singer, 2012; Jacoby et al., 2015). Thus, the All mediates so-  
70 called “cross-over” inhibition, whereby one pathway (ON, in this case) suppresses the other  
71 (OFF) and thereby decorrelates their outputs (Demb and Singer, 2015).

72 Examination of the RB pathway has provided significant insight into the transformation of  
73 sensory stimuli into neural responses, particularly under conditions when the signal is sparse  
74 (Field et al., 2005). Although well-studied, several uncertainties about RB pathway function  
75 remain. Most significantly, we do not know the identity of the spiking, GABAergic AC that drives  
76 a receptive field surround in the All during rod-mediated vision via synaptic inhibition of the All  
77 itself (Bloomfield and Xin, 2000); understanding mechanisms contributing to surround inhibition

78 is important because such inhibition tunes All responses to spatial features of the visual  
79 stimulus.

80 Here, we identified the major inhibitory input to the All by combining anatomical, genetic,  
81 and electrophysiological analyses in a three-step process. One, we reconstructed ACs that  
82 provided synaptic input to Alls in a volume of mouse retina imaged by scanning block-face  
83 electron microscopy [SBEM; (Denk and Horstmann, 2004)]. Two, we evaluated published  
84 descriptions of reporter mouse lines to identify genetically-accessible ACs that had the  
85 anatomical characteristics of the cells reconstructed from SBEM images. And three, we used  
86 electrophysiological recordings and genetics-based circuit analysis to demonstrate that a  
87 candidate AC, which provided the great majority of the inhibitory synaptic input to Alls, exhibited  
88 a light response predicted by its anatomy and made GABAergic synapses onto Alls. This  
89 spiking, GABAergic AC is a multistratified, ON AC denoted NOS-1 AC and identified in the  
90 nNOS-CreER mouse (Zhu et al., 2014). We conclude that the NOS-1 AC is an integral  
91 component of the RB pathway and a significant source of long-range inhibition during night  
92 vision. More generally, our study demonstrates the utility of targeted, small-scale “connectomic”  
93 analysis for identification of novel neural circuits.

94

## 95 **Results**

### 96 *Alls in the mouse retina exhibit a TTX-sensitive, GABAergic receptive field surround*

97 The inhibitory receptive field surround of Alls has been studied extensively in the rabbit  
98 retina, where it is GABAergic and appears to be generated by spiking ACs because it is  
99 suppressed by the voltage-gated sodium channel blocker tetrodotoxin (TTX) (Bloomfield and  
100 Xin, 2000; Xin and Bloomfield, 1999). Here, we began by probing for the existence of a similar  
101 TTX-sensitive surround mechanism in Alls of the mouse retina (Figure 2A).

102 Alls were targeted for recording in the whole-mount retina [see Methods; (Mortensen et al.,  
103 2016)], and rods were stimulated with light spots of varying diameter eliciting  $10 R^* / \text{rod} / \text{s}$ .  
104 Evoked excitatory currents (voltage-clamp;  $V_{\text{hold}} = E_{\text{Cl}} = -70 \text{ mV}$ ) increased with spot diameter  
105 well beyond the physical  $\sim 30 \mu\text{m}$  width of the All dendritic field (Figure 2B). This wide receptive  
106 field of excitation is explained by electrical coupling within the All network (Hartveit and Veruki,  
107 2012; Xin and Bloomfield, 1999): an excitatory current originating in surrounding Alls spreads  
108 laterally as a coupling current. Recording at  $V_{\text{hold}} = E_{\text{cation}} = +5 \text{ mV}$  during spot presentation in  
109 control (Ames') medium yielded an evoked current comprising a mixture of genuine inhibitory  
110 current and unclamped coupling current. In the presence of TTX, the inhibitory input was  
111 suppressed, leaving the coupling current (Figure 2A). The difference current (Ames' – TTX;

112 Figure 2A) is the isolated, TTX-sensitive, rod-driven inhibitory input, which increased as a  
113 function of spot diameter (Figure 2C). We observed as well that TTX exerted a mild suppressive  
114 effect on the excitatory light-evoked current, suggesting that spiking interneurons influence  
115 synaptic transmission from the presynaptic bipolar cells (Figure 2B).

116

### 117 *Propagation of the All surround to downstream ganglion cells*

118 The surround suppression of AIs is expected to be propagated to the GCs that receive input  
119 from the RB-AI network. While recording from three GC types—ON  $\alpha$ , OFF  $\alpha$ , and OFF  $\delta$   
120 GCs—rods were stimulated with dim (evoking either 4 or 40  $R^*$  / rod / s) spots of varying size;  
121 this stimulus will evoke excitatory postsynaptic currents (EPSCs) in ON  $\alpha$  GCs and inhibitory  
122 postsynaptic currents (IPSCs) in OFF  $\alpha$  and  $\delta$  GCs that reflect the output of the RB-AI network  
123 (Murphy and Rieke, 2006, 2008).

124 As spot diameter increased up to 2000  $\mu\text{m}$ , EPSCs in ON  $\alpha$  GCs and IPSCs in OFF  $\alpha$  and  $\delta$   
125 GCs first increased and then decreased in amplitude, reflecting an initial increase in the  
126 receptive field center response and then subsequent surround suppression of the center  
127 response (Figure 2D-F). In all three cell types, surround suppression was blocked similarly by  
128 TTX, suggesting that it was mediated by a common presynaptic mechanism: inhibition of the  
129 AI. Thus, the mouse AI exhibits a TTX-sensitive receptive field surround mediated by direct  
130 inhibitory synapses and this surround is propagated to GCs. To understand the mechanism for  
131 surround inhibition, we searched for the inhibitory ACs presynaptic to the mouse AI.

132

### 133 *Anatomical identification of inhibitory synaptic inputs to AIs*

134 We began by skeletonizing three AI ACs distributed across serial block face electron  
135 microscopy (SBEM) volume k0725 [mouse retina; 50 X 210 X 260  $\mu\text{m}$ ; (Ding et al., 2016). AIs  
136 were traced from their locations presynaptic to dyad ribbon synapses at RB terminals that were  
137 themselves identified by morphology and position within the inner plexiform layer (IPL) (Graydon  
138 et al., 2018; Mehta et al., 2014; Pallotto et al., 2015). For each of these three AIs, we annotated  
139 all of the inputs from ribbon synapses, arising from RBs, as well as all of the conventional  
140 synaptic inputs, presumed to arise from inhibitory ACs (Figure 3A). AIs received substantial  
141 input to their distal (ON layer) dendrites from RBs (Table 1; Figure 3B1), consistent with  
142 published descriptions (Strettoi et al., 1992; Tsukamoto and Omi, 2013). With regard to  
143 inhibitory input, it is notable that virtually all AC inputs to the AI were in the inner IPL (ON layer),  
144 on the distal dendrites; the remainder of the AC inputs were on the somas and most proximal  
145 portions of the AI dendrites (Table 1; Figure 3B2).

|                      | All #1    | All #2    | All #3    | Mean $\pm$ SD             |
|----------------------|-----------|-----------|-----------|---------------------------|
| <b>Inputs (from)</b> |           |           |           |                           |
| RB                   | 173       | 171       | 176       | 173 $\pm$ 3               |
| AC (Total)           | 178       | 177       | 176       | 177 $\pm$ 1               |
| AC (ON layer)        | 161 (96%) | 157 (89%) | 161 (91%) | 160 $\pm$ 2 (92 $\pm$ 4%) |
| AC (Soma)            | 17 (4%)   | 20 (11%)  | 15 (9%)   | 17 $\pm$ 3 (8 $\pm$ 4%)   |

146

147 For each All, we skeletonized 21 of the AC inputs to the distal dendrites to assess the  
148 morphology of the presynaptic neurons (Figure 3C1,2). Of the 63 AC skeletons created, 61  
149 were of neurites, generally unbranched, that extended through the volume and appeared to be  
150 axons: each of these originated from an AC not contained in the SBEM volume (Figure 3C2).  
151 After annotating their output synapses, we determined that these axons made synapses with  
152 Alls almost exclusively; the remainder of the output was to RBs with very few synapses to ON  
153 CBs and unidentified cells (Table 2; Figure 3C2). This determination was made by tracing the  
154 postsynaptic neurites sufficiently to identify RBs from their characteristic axon terminals, which  
155 are large and make dyad synapses with presumed Alls and A17 ACs, and to identify Alls based  
156 on several characteristic features: a soma position at the border of the INL and IPL; very thick  
157 proximal dendrites; and a postsynaptic position at RB dyad synapses [see (Graydon et al.,  
158 2018; Mehta et al., 2014; Strettoi et al., 1990; Strettoi et al., 1992)].

159 These 61 axons made 130 synapses onto the 3 reconstructed Alls, giving rise to ~25% of  
160 the total inhibitory input to each All. Therefore, assuming that each axon arises from a distinct  
161 cell, most Alls receive ~2 inputs (i.e. ~130 synapses/61 axons) from each presynaptic AC; these  
162 inputs occur at sites close to RB→All synapses (Figure 3B, 3C5). The inputs to the All somas  
163 and proximal (OFF layer) dendrites were not considered in as much detail because these were  
164 few in number and presumed to arise from dopaminergic ACs (DACs) (Contini and Raviola,  
165 2003; Gustincich et al., 1997; Voigt and Wässle, 1987). Analysis of inputs to one of the three  
166 Alls supported this proposition (Figures 3C3,4): 8 neurites that contacted primarily its soma as  
167 well as somas of neighboring Alls. These 8 neurites made 113 output synapses in total, 90  
168 (80%) of which were to Alls and 23 were to other cells. All somas appeared to be enveloped in  
169 a “basket” of such neurites (Figure 3C6), as noted previously for DAC→All synapses  
170 (Gustincich et al., 1997; Voigt and Wässle, 1987).

171 Two of the 63 AC skeletons that made inputs to the All distal dendrites could be traced to a  
172 relatively complete neuron contained within the SBEM volume (Figure 4A, B). These two ACs  
173 appeared to be of the same type and were characterized as displaced (with somas in the GC

174 layer), multi-stratified cells, with processes in both the ON and OFF strata of the IPL. As well, it  
175 was notable that the neurites tended to branch at approximately right angles when viewed *en*  
176 *face*.

177

### 178 *Anatomical assessment of an AC circuit presynaptic to the All*

179 We annotated all of the synaptic connections—inputs and outputs—made by the two ACs  
180 contained within the volume and then identified each pre- or postsynaptic partner (Figure 4A, B).  
181 Both ACs exhibited very similar patterns of connectivity, as quantified in Table 2. Interestingly,  
182 the vast majority of synaptic output was to Alls (confirmed as described above); a smaller but  
183 significant portion was to RBs (again, confirmed as above), with the remainder to ON CBs  
184 (which were skeletonized completely; below). We did not observe any synapses onto other ACs  
185 or onto GCs. Thus, these two ACs appear to be representatives of a single AC type that  
186 contacts preferentially neurons in the RB pathway, specifically Alls. Given the similarity of the  
187 postsynaptic target neuron populations of these ACs and the axons reconstructed partially and  
188 described above (Figure 3C1, C2), we believe all to be representative of the same AC type, a  
189 cell that contacts Alls preferentially and provides the vast majority of inhibitory synapses to the  
190 All.

191 Both ACs received very similar numbers of inputs from conventional and ribbon synapses  
192 (Table 2). The conventional synapses were presumed to arise from inhibitory ACs; these  
193 synapses were annotated, but we did not attempt to identify the presynaptic cells. Excitatory  
194 inputs both from *en passant*, axonal ribbon synapses and from more typical, axon terminal  
195 ribbon synapses were observed; analysis of the presynaptic cells revealed them to be ON  
196 bipolar cells—both RBs and ON CBs—exclusively (Table 2). Thus, this AC appears to receive  
197 only excitatory ON bipolar input despite its being a multi-stratified cell with processes in both ON  
198 and OFF sublaminae of the IPL.

199

200

|                      | <b>Axons<br/>(Figure 3C2)</b> | <b>Cell 1<br/>(Figure 4)</b> | <b>Cell 2<br/>(Figure 4)</b> |
|----------------------|-------------------------------|------------------------------|------------------------------|
| <b>Inputs (from)</b> | Total: 2                      | Total: 314                   | Total: 297                   |
| AC                   |                               | 200 (63.5%)                  | 183 (61%)                    |
| RB                   | 1                             | 47 (15%)                     | 56 (19%)                     |
| ON CB                | 1                             | 66 (21%)                     | 55 (18.5%)                   |
| Unidentified         |                               | 2 (<1%)                      | 3 (1%)                       |



| Outputs (to) | Total: 1425 | Total: 115 | Total: 106 |
|--------------|-------------|------------|------------|
| All          | 1212 (85%)  | 93 (81%)   | 86 (81%)   |
| RB           | 173 (12%)   | 11 (9.5%)  | 18 (17%)   |
| ON CB        | 35 (2%)     | 11 (9.5%)  | 2 (2%)     |
| Unidentified | 5 (<1%)     |            |            |

201

202 The 121 ON CB synapses onto the 2 ACs arose from 67 presynaptic ON CBs, and we  
203 skeletonized these ON CBs in order to identify them based on morphological characteristics and  
204 axon terminal depth within the IPL. We used the positions of the cholinergic starburst ACs in the  
205 SBEM volume as standard markers of IPL depth (Figure 4C) (Ding et al., 2016; Helmstaedter et  
206 al., 2013; Manookin et al., 2008; Sabbah et al., 2017; Stabio et al., 2018). Most of the  
207 presynaptic ON CBs belonged to the type 6 population; the others were a mix of types 5, 7 and  
208 8 CBs (two cells could not be fully reconstructed and were unidentified) (Figure 4C). Fifteen *en*  
209 *passant* (axonal) synapses onto the outer (OFF-layer) dendrites of the reconstructed ACs were  
210 observed (Figure 4D): 13 from type 6 cells and two from the unidentified cells (likely type 6  
211 CBs). Both the occurrence of these axonal ON bipolar cell synapses and their general  
212 appearance are consistent with previous reports (Dumitrescu et al., 2009; Hoshi et al., 2009;  
213 Kim et al., 2012; Lauritzen et al., 2013). Although, we observed *en passant* synapses in the  
214 axons of some, but not all, reconstructed type 5, 7 and 8 ON CBs, none of these *en passant*  
215 synapses were presynaptic to the reconstructed ACs. Additionally, *en passant* synapses in  
216 axons of type 6 cells had a markedly distinct appearance: ribbons that tended to occur in  
217 clusters of at least three, all apposed to the same postsynaptic process (Figure 4D). In this  
218 respect, they resemble strongly the axonal ribbons observed in calbindin-positive ON CBs of the  
219 rabbit retina, which are likely homologous to mouse type 6 CBs because both share similar  
220 morphology and make synapses with ON  $\alpha$  GCs (Hoshi et al., 2009; Kim et al., 2012; Schwartz  
221 et al., 2012; Tien et al., 2017).

222 The 103 RB synapses with these two ACs arose from 77 RBs (all of which were  
223 skeletonized; not shown). All RB→AC synapses were dyads (Figure 4E); at 75% of these  
224 dyads, the AC replaced the A17 (i.e. the other postsynaptic cell was an All), and at the  
225 remainder of the dyads, the AC either replaced the All (18%) or else the identity of the second  
226 postsynaptic cell could not be confirmed (7%). In at least two of the cases in which the second  
227 cell at the dyad could not be identified, the dendrite had the appearance of those of the  
228 skeletonized ACs: a very thick dendrite containing clear cytoplasm. Thus, it appears that this AC  
229 receives a significant portion of its excitatory input (48%; see Table 2) from the RB population



230 but that any individual RB provides only one or two synapses to a single AC; the latter finding is  
231 consistent with the vast majority of RB output being at dyad synapses with A11 and A17  
232 amacrine cells (Demb and Singer, 2012).

233 A number of multistratified AC types have been reported in anatomical studies of the mouse  
234 retina (Badea and Nathans, 2004; Lin and Masland, 2006; Perez De Sevilla Muller et al., 2007).  
235 The vast majority of these, however, differ in their morphology from the ACs studied here: e.g.,  
236 of the 16 wide-field, axon-bearing ACs categorized by Lin and Masland (2006; their Figure 10),  
237 none have axons in the inner (ON) layer of the IPL and a narrow field of dendrites in the outer  
238 (OFF) layer. We were struck, though, by the resemblance of the AC identified here to one  
239 identified in a screen of Cre-driver lines: the NOS-1 AC of the nNOS-CreER mouse (Zhu et al.,  
240 2014). Therefore, we tested the hypothesis that the NOS-1 AC is the spiking, ON AC that  
241 provides inhibitory synaptic input to the A11.

242

#### 243 *The NOS-1 AC is a spiking ON cell*

244 NOS-expressing (NOS+) ACs were targeted for *in vitro* recording by crossing nNOS-CreER  
245 mice with Cre-dependent reporter mice (Ai32: ChR2/eYFP fusion protein expression; Zhu et al.,  
246 2014; Park et al., 2015) and then inducing recombination in ~1 month old offspring by tamoxifen  
247 injection (see Methods). eYFP fluorescence (eYFP+) observed by two-photon laser scanning  
248 microscopy (2PLSM) was used to target NOS+ ACs for recording. We studied retinas in which  
249 Cre expression was induced robustly; these had  $110 \pm 5$  cells  $\text{mm}^{-2}$  (mean  $\pm$  sem) labeled in the  
250 GCL and  $128 \pm 5$  cells  $\text{mm}^{-2}$  labeled in the INL ( $n = 7$  retinas from 7 mice). Based on an earlier  
251 description of this driver line, we assumed that labeled cells in the GCL included a mixture of  
252 NOS-1 and NOS-2 ACs, with NOS-1 cells having the bistratified morphology described here and  
253 NOS-2 cells exhibiting thick, spiny dendrites that project into the central level of the IPL,  
254 between the layers marked by dendrites of ON and OFF starburst ACs (Jacoby et al., 2018; Zhu  
255 et al., 2014). Labeled cells in the INL included additional NOS-2 ACs (Zhu et al., 2014) as well  
256 as other AC types that projected into the outer most levels of the IPL but were not studied here.

257 Dye filling (Lucifer Yellow) of recorded eYFP+ cells in the GCL revealed that these cells  
258 most typically were NOS-1 ACs, with bistratified dendrites and long axons identified by 2PLSM  
259 following recording and, in some cases, by subsequent analysis by confocal microscopy ( $n = 13$   
260 cells; Figure 5A). Whole-cell recordings of membrane voltage (i.e. current-clamp recordings)  
261 showed that NOS-1 cells fired spikes in response to positive contrast and that spiking could be  
262 suppressed completely by negative contrast (Figure 5B). Responses increased in magnitude  
263 with increasing spot diameter, suggesting an integration area of at least ~500- $\mu\text{m}$  diameter

264 (Figure 5C). NOS-2 cell membrane voltage responses to light clearly differed from those of  
265 NOS-1 cells (Figure 5D, E). NOS-2 cells were non-spiking with graded, depolarizing responses  
266 to both positive and negative contrast and are therefore ON-OFF cells (Jacoby et al., 2018).  
267 Both ON and OFF responses of NOS-2 cells increased with spot diameter, with a relatively  
268 more gradual increase for the OFF response (Figure 5F).

269 Voltage-clamp recording from NOS-1 cells demonstrated that positive contrast evoked  
270 excitatory synaptic input, measured as inward current relative to a standing current ( $V_{\text{hold}} = E_{\text{Cl}}$ )  
271 (Figure 5G, H). Negative contrast evoked a net outward current, consistent with temporary  
272 suppression of ongoing presynaptic glutamate release (Figure 5G, H, J). Excitatory input was  
273 blocked completely by L-AP4, which suppresses ON bipolar cells (Slaughter and Miller, 1981)  
274 (Figure 5G). Inhibitory synaptic input ( $V_{\text{hold}} = E_{\text{cat}}$ ) was measured at both positive and negative  
275 contrast but was typically small under control conditions; in the presence of L-AP4, however,  
276 inhibition persisted only in response to negative contrast and became larger than in control  
277 conditions (Figure 5G, H); the amplitude of the response to negative contrast in L-AP4  
278 increased by  $38 \pm 11.4$  pA ( $t = 3.3$ ;  $n = 9$ ;  $p < 0.005$ ; Figure 5I). Thus, NOS-1 cells receive tonic  
279 glutamatergic input from ON bipolar cells that is modulated by contrast and inhibitory inputs  
280 from both ON and OFF pathways.

281

282 *The NOS-1 AC is the predominant NOS-expressing AC in the ganglion cell layer and is distinct*  
283 *from CRH-expressing ACs.*

284 To determine the relative density of displaced NOS-1 and NOS-2 ACs in the GCL of the  
285 nNOS-CreER retina, we made loose patch recordings of responses to light from displaced  
286 eYFP+ ACs targeted by 2PLSM (Figure 6A). Most displaced ACs were spiking cells with  
287 sustained ON responses, confirming their identity as NOS-1 cells ( $n = 22/26$  cells, three retinas  
288 from two mice). One exception was a spiking cell with both ON and OFF responses (Figure 6A,  
289 asterisk); we did not study this cell further, but it likely represents either a subtype of nNOS AC  
290 that is primarily in the INL and only rarely displaced to the GC or a case of ectopic Cre and / or  
291 reporter expression. In the NOS-1 population,  $\sim 2$ -3 cells could typically be found within  $\sim 54,500$   
292  $\mu\text{m}^2$ , the cross-sectional area of our SBEM volume; this cell density is consistent with our finding  
293 two putative NOS-1 cells in the SBEM data set.

294 Additionally, we examined NOS-expressing cells by nNOS antibody labeling during a  
295 developmental period (P8 – P14) during which a subset of NOS+ cells express the transcription  
296 factor Lhx9 (Balasubramanian et al., 2017). Two populations of NOS+ cells were observed: a  
297 small group of brightly-labeled cells ( $n = 19$  cells) and a much larger group of dimly-labeled cells

298 (n = 550 cells; six retinas from six mice; n = 2 retinas each at P8, P12 and P14). In retinas  
299 double-labeled with the Lhx9 antibody (two retinas from two animals, P12), only the dimly-  
300 labeled NOS<sup>+</sup> cells were Lhx9<sup>+</sup> (Figure 6B-D) (n = 146/156 cells). The brightly-labeled, Lhx9-  
301 cells (n = 5/5 cells, two retinas from two mice) exhibited dendrites that could be followed into the  
302 center of the IPL, where they gave rise to the thick, spiny processes characteristic of NOS-2  
303 cells (Figure 6E). We conclude that Lhx9 expression distinguishes NOS-1 from NOS-2 cells in  
304 the GCL at P12, and that at all developmental time points, NOS-2 cells are rarely found in the  
305 GCL (3.3% of cells), making NOS-1 cells a large majority in the GCL (96.7% of NOS<sup>+</sup> cells).

306 The NOS-1 cell was described also as the CRH-2 cell (Corticotropin-releasing hormone AC-  
307 2) based on labeling in the CRH-ires-Cre retina (Zhu et al., 2014). We, however, found that Cre-  
308 expressing cells in the CRH-ires-Cre::Ai32 retina are rarely labeled by the nNOS antibody (Park  
309 et al., 2018), suggesting limited overlap in CRH<sup>+</sup> and NOS<sup>+</sup> AC populations. Indeed, we found  
310 no co-expression of CRH and NOS by immunohistochemistry (P12 retina) (n = 66 CRH<sup>+</sup> cells  
311 and 85 NOS<sup>+</sup> cells, one retina) in neurons in the GCL (Figure 6E-G). Thus, NOS-1 ACs do not  
312 appear to co-express CRH, and we conclude, then, that Cre expression in NOS-1 ACs of the  
313 CRH-ires-Cre line is rare and unsystematic.

314

### 315 *Confirmation of synapses between NOS-1 cells and AIs*

316 To demonstrate that NOS-1 ACs provide synaptic input to AIs, we eliminated Cre-  
317 expressing ACs in the nNOS-CreER retina by intraocular injection of an AAV containing a Cre  
318 dependent-DTA construct followed 2-3 days later by tamoxifen administration. Four weeks later,  
319 we stimulated the retina *in vitro* with dim (40 R\* / rod / s) spots of varying size and recorded  
320 light-evoked currents in AIs at  $V_{\text{hold}} = E_{\text{Cl}}$  or  $V_{\text{hold}} = E_{\text{cat}}$  (Figure 7A; as in Figure 2A). Following  
321 ablation of NOS<sup>+</sup> ACs (including both NOS-1 and NOS-2 cells), the recorded excitatory currents  
322 were smaller than in the control condition and were unaffected by TTX (Figure 7B; compare to  
323 Figure 2B), consistent with a loss of inhibitory input from NOS-1 ACs to presynaptic RBs (Figure  
324 4 and Table 2). Most significantly, though, we observed a lack of inhibitory TTX-sensitive  
325 surround in AI responses following NOS<sup>+</sup> AC ablation (Figure 7A, C): the TTX-sensitive IPSC  
326 evoked by a 400- $\mu\text{m}$  diameter spot was significantly smaller in DTA-expressing retinas than in  
327 controls (compare to Figure 2).

328 We confirmed the elimination of NOS<sup>+</sup> ACs by nNOS antibody staining and found that the  
329 number of NOS<sup>+</sup> cells was reduced strongly in DTA-expressing retinas relative to controls  
330 (Figure 7D, F). To confirm that DTA expression did not result in non-specific ablation of ACs, we  
331 used ChAT antibody immunolabeling to quantify the number of starburst ACs (in both the INL

332 and GCL) in control and DTA-expressing retinas and found no reduction in the experimental  
333 group (Figure 7E, G). Thus, elimination of NOS<sup>+</sup> ACs provides evidence that a NOS<sup>+</sup> cell, most  
334 likely the NOS-1 AC, is necessary for generating the All inhibitory surround.

335 To confirm that NOS-1 ACs provide synaptic input to Alls, we performed optogenetic circuit-  
336 mapping experiments after inducing ChR2/eYFP expression in NOS<sup>+</sup> cells, as described above.  
337 After blocking the influence of the photoreceptors (see Methods), we recorded from cells in a  
338 retinal whole-mount preparation and stimulated ChR2-expressing neurons with bright blue light.  
339 A representative ChR2-expressing NOS-1 cell (n = 3 total) responded within a few ms of the  
340 optogenetic stimulus with increased spiking (Figure 8A); IPSCs recorded in Alls (normalized to  
341 their peak amplitude, 39 ± 6 pA) were observed a few ms later (Figure 8A), consistent with a  
342 monosynaptic connection from NOS-1 cells.

343 ChR2-evoked IPSCs in Alls were blocked by SR95531 (50 μM) and therefore were  
344 mediated by GABA<sub>A</sub> receptors (Figure 8B, C) (reduction of 34.5 ± 11.7 pA, or 108 ± 4%; t =  
345 28.5; n = 4; p < 0.001). In a second group of cells, the IPSCs were blocked by TTX (1 μM),  
346 indicating that they arose from a spiking presynaptic AC (Figure 8D, E) (reduction of 35.1 ± 8.9  
347 pA or 105 ± 4%; t = 29.5; n = 5; p < 0.001). These results are consistent with a direct synaptic  
348 input from the NOS-1 AC to the All because input from the non-spiking NOS-2 AC would not be  
349 TTX-sensitive. The spiking dopaminergic AC (DAC) also makes GABAergic synapses with the  
350 somas and proximal dendrites of Alls (Figure 3B2, C3-5) (Gustincich et al., 1997), but the DACs  
351 in the nNOS-CreER retina do not express ChR2/eYFP, as demonstrated  
352 immunohistochemically: there was no overlap between TH<sup>+</sup> cells, identified by TH  
353 immunolabeling (n = 90 cells), and eYFP<sup>+</sup> cells (n = 198 cells, five retinas from three mice)  
354 (Figure 8F, G).

355 Additionally, we recorded ChR2 evoked IPSCs in RBs in retinal slices (n=2) to confirm the  
356 functionality of NOS-1 AC→RB synapses observed in our anatomical analyses (Figures 3C1,  
357 C2, C6 and 4A, B). Here, we had to include the K channel blockers 4-AP and TEA in the  
358 external solution to enhance the excitability of cut NOS-1 AC axons so that they could be  
359 stimulated adequately in the slice (Figure 9, left); control experiments recording from Alls in both  
360 slice (Figure 9, left) and whole-mount (Figure 9, right) retinal preparations demonstrated that  
361 this manipulation enhanced release from NOS-1 cells significantly (n=3). Notably, enhancing  
362 excitability in both retinal slices and whole-mount preparations did not change the latency of the  
363 IPSCs, supporting the conclusion that they are monosynaptic.

364  
365

## 366 Discussion

367 Ultrastructural analysis of inhibitory input to three AIs indicated that the majority of AC  
368 synapses arise from a single type of displaced, multistratified, wide-field cell that contacts AIs  
369 preferentially. Two relatively complete examples of this AC were found within our SBEM  
370 volume, and examination of this cell type's outputs revealed that ~80% of its synapses were  
371 presynaptic to AIs, with the majority of the remainder presynaptic to RBs. This AC received  
372 excitatory input exclusively from ON bipolar cells, both at en-passant axonal synapses in the  
373 OFF strata of the IPL and at axon terminal synapses in the ON strata of the IPL. The AC  
374 identified by SBEM analysis is a morphological match to the genetically-identified NOS-1 AC,  
375 which we demonstrated to have physiological functions predicted by the ultrastructural analysis:  
376 it is an ON AC that provides GABAergic inhibition to AIs and RBs. We therefore consider the  
377 NOS-1 AC to be an integral part of the well-studied mammalian RB pathway, serving as the  
378 major source of direct, long-range inhibition during night vision.

379

### 380 *Multiple cell types in nNOS-creER retina*

381 Cre-mediated recombination drove ChR2/eYFP reporter expression in multiple AC types in  
382 the nNOS-creER retina. We observed two AC types, called NOS-1 and NOS-2, (Jacoby et al.,  
383 2018; Zhu et al., 2014), consistent with reports of nNOS expression in at least two AC types  
384 (Chun et al., 1999; Kim et al., 1999).

385 The NOS-1 AC is described above. The NOS-2 AC is a monostratified cell, with dendrites in  
386 the center of the IPL (between the processes of ON and OFF starburst ACs; Figure 5D); its  
387 soma is either in the conventional location in the INL (~75%) or displaced to the GCL (~25%)  
388 (Chun et al., 1999; Jacoby et al., 2018; Kim et al., 1999; Zhu et al., 2014). There were additional  
389 labeled ACs in the INL of the nNOS-CreER retina: their processes stratified in the OFF layers  
390 proximal to the INL, but the cells were not characterized further.

391 Our anatomical evidence, however, supports the conclusion that the NOS-1 AC is the only  
392 Cre-expressing AC presynaptic to the AI: NOS-2 dendrites are confined to the center of the  
393 IPL, between the OFF and ON starburst ACs, whereas inhibitory inputs to AIs are either distal  
394 to the OFF starburst processes and apparently arise from dopaminergic ACs (not labeled in the  
395 nNOS-CreER line; Figure 6F, G) or proximal to the ON starburst AC processes (Figure 3). As  
396 well, in tracing many AC inputs to AIs, composing ~25% of the total inhibitory synaptic input to  
397 these AIs, we never encountered an axon that stratified between the ON and OFF starburst  
398 ACs.

399



400 *The NOS-1 AC is the dominant inhibitory input to the All and generates the All surround*

401 The All has an ON-center receptive field with an antagonistic surround (Bloomfield and Xin,  
402 2000; Nelson, 1982; Xin and Bloomfield, 1999). The surround is mediated by GABAergic  
403 inhibition, it depends on activation of ON bipolar cells, and it is blocked by TTX, indicating that it  
404 arises from a spiking AC (Bloomfield and Xin, 2000) (Figure 2D-G). The NOS-1 AC satisfies all  
405 of the criteria for the mechanism generating the All surround: it is a GABAergic [Figure 8A, B  
406 (Zhu et al., 2014)], spiking ON AC (Figure 5B, C; Figure 8C, D) that provides the majority of its  
407 synaptic output to Alls (Figures 3 and 4; Table 2). Furthermore, NOS+ ACs are necessary for  
408 generating TTX-dependent surround inhibition in Alls (Figure 7A, B).

409 Our conclusion that the NOS-1 AC provides ~90% (Table 1) of the inhibitory input to the All  
410 is based on the assumption—strongly supported by the anatomical evidence (Figures 3 and  
411 4)—that a single cell type is presynaptic to all of the inhibitory synapses on the distal dendrites  
412 of Alls. Given that every inhibitory input to the distal dendrites of three Alls analyzed arises from  
413 a process with a stereotyped pattern of synaptic output (Figures 3C2 and 4A, B), we assume  
414 they represent a single type. The alternative seems very unlikely: that there are multiple  
415 independent populations of amacrine cell, each of which has axons identical in appearance,  
416 running in exactly the same stratum of the IPL, providing the identical pattern of 80% output to  
417 Alls and 20% output to RBs, and matching precisely the pattern of output of the two  
418 reconstructed cells (both of which share identical patterns of inputs as well as outputs). Indeed,  
419 it is established that individual retinal neuron types are defined by their highly stereotyped  
420 patterns of connectivity (Briggman et al., 2011; Cohen and Sterling, 1990; Graydon et al., 2018;  
421 Hoggarth et al., 2015). Further, the combination of wide-field axons in the ON laminae of the IPL  
422 and narrow-field dendrites in the OFF laminae of the IPL apparently is restricted to a single  
423 population of wide-field AC (Lin and Masland, 2006; Zhu et al., 2014).

424 From our SBEM analysis, the multi-stratified AC presynaptic to the All is predicted to be an  
425 ON cell that should be activated by dim scotopic stimuli owing to its input from RBs as well as  
426 from type 6 CBs, which are well-coupled to the All network (Grimes et al., 2014b): our  
427 observations of the light responses of NOS-1 ACs (Figure 6), their synaptic connectivity  
428 (Figures 8-9), and the properties of surround suppression of GC responses to dim light stimuli  
429 (Figure 2D) collectively support the conclusion that the NOS-1 AC is the primary inhibitory  
430 neuron influencing the output of the All network to rod-driven input. As well, it is notable that the  
431 NOS-1 AC appears to be one significant mechanism by which cone pathways can inhibit rod  
432 pathways (Lauritzen et al., 2016). And, given that the NOS-1 AC produces NO, which is thought  
433 to regulate electrical transmission between Alls and ON cone bipolar cells (Mills and Massey,

434 1995), it is possible that synaptic inhibition of the All is coupled with modulation of its electrical  
435 synapses.

436

#### 437 *Functional relevance*

438 When considering the stochastic nature of single photon absorption by rods, the rod  
439 integration time, and the pooling of the output of multiple rods, the ability of RBs to encode  
440 contrast in natural scenes emerges at a mean luminance of ~10-20 R\*/rod/s (Beaudoin et al.,  
441 2008). Significantly, as luminance increases from darkness to 10-20 R\*/rod/s, the gain of  
442 transmission at the RB→All synapse is reduced (Dunn et al., 2006; Dunn and Rieke, 2008), and  
443 Alls hyperpolarize; this hyperpolarization spreads to the terminals of type 6 CBs and increases  
444 rectification at type 6→ON  $\alpha$  GC synapses to counter the influence of activity-dependent  
445 synaptic depression (Grimes et al., 2014a). Although it was suggested previously that synaptic  
446 depression at the RB→All synapse caused the hyperpolarization of the All (Grimes et al.,  
447 2014a), we think it more likely that synaptic inhibition is the major driver of this phenomenon  
448 because we previously demonstrated that the RB→All synapse remains functional at  
449 backgrounds as high as 250 R\*/rod/s (Ke et al., 2014).

450 Thus, inhibitory input from the NOS-1 AC might represent a significant modulatory  
451 mechanism within the RB pathway and could be responsible for maintaining high-fidelity  
452 signaling through a range of background luminance at which differentiating signal from noise is  
453 a particular concern. More generally, because the type 6 CB provides input to the NOS-1 AC  
454 and is coupled electrically to the All network that is inhibited by the NOS-1 AC, we propose that  
455 a type 6 CB→NOS-1 AC→All AC→type 6 CB feedback circuit could maintain the rectifying  
456 nature of transmission at type 6 CB synapses by preventing excessive presynaptic  
457 depolarization under a range of lighting conditions.

458

#### 459 *Conclusion*

460 We uncovered the dominant inhibitory input to the All, the central neuron in the well-studied  
461 RB pathway of the mammalian retina. The NOS-1 AC is the spiking neuron responsible for  
462 generating the TTX-sensitive, GABAergic surround that modulates All network function across a  
463 range of lighting conditions (Bloomfield and Xin, 2000; Xin and Bloomfield, 1999). Further, our  
464 anatomical analysis also explained the ON response of a multi-stratified AC with neurites and  
465 excitatory synaptic inputs in both the ON and OFF strata of the IPL. Our study thereby extends  
466 the classification of retinal neurons that receive ON input from *en-passant* axonal synapses  
467 made by ON bipolar cells in the OFF strata of the IPL, which also includes the dopaminergic AC



468 and the intrinsically-photosensitive ganglion cells (Dumitrescu et al., 2009; Hoshi et al., 2009;  
469 Sabbah et al., 2017). Our study demonstrates the utility of a targeted connectomic analysis  
470 coupled with neurophysiological investigation to neural circuit discovery.

471

472 **Methods:**

473 *TEM:* An excised retina was fixed for one hour at room temperature with 2% glutaraldehyde in  
474 0.15 M cacodylate buffer, washed in three changes of the same buffer, and postfixed with 1%  
475 osmium tetroxide in 0.15 M cacodylate containing 1.5% potassium ferrocyanide. A wash in three  
476 changes of distilled water followed the reduced osmium fixation and preceded an *en bloc* fix in  
477 2% aqueous uranyl acetate. Dehydration in a graded series of ethanol (35% to 100%), and  
478 infiltration in a propylene oxide:epoxy resin series was followed by embedding and  
479 polymerization in epoxy resin. Thin sections were cut on a Reichert Ultracut E ultramicrotome,  
480 stained with 2% uranyl acetate and 0.2% lead citrate before being viewed and photographed on  
481 a Zeiss EM10 CA transmission electron microscope.

482

483 *SBEM Analysis:* Dataset k0725, a 50×210×260 μm block of fixed mouse retina imaged with  
484 voxel size 13.2×13.2×26 nm (Ding et al., 2016) was analyzed. Manual skeletonization and  
485 annotation were performed using Knossos ([www.knossos-tool.org](http://www.knossos-tool.org)); (Helmstaedter et al., 2011).  
486 Tracing began at RB terminals, which were easily identified based on their size and position  
487 within the inner plexiform layer (IPL) (Mehta et al., 2014; Pallotto et al., 2015). From RB dyad  
488 synapses, all were traced, and then, from sites of synaptic input, ACs were traced. All  
489 skeletons and annotations were checked by two expert observers. Voxel coordinates were tilt-  
490 corrected and normalized to the positions of the ON and OFF SACs [per (Helmstaedter et al.,  
491 2011)] identified by Ding (Ding et al., 2016). Connectivity analysis was performed using custom-  
492 written Python scripts. Skeletons were visualized in Paraview ([www.paraview.org](http://www.paraview.org)).

493

494 *Electrophysiology:* All animal procedures were approved by the Institutional Animal Care and  
495 Use Committees at Yale University or the University of Maryland. Experiments used offspring of  
496 nNOS-CreER and Ai32 mice. In nNOS-CreER mice (B6; 129S-Nos1<sup>tm1.1(cre/ERT2)/Zjh</sup>/J; Jackson  
497 Laboratory #014541, RRID:IMSR\_JAX:014541), expression of Cre recombinase is driven by  
498 endogenous Nos1 regulatory elements (Taniguchi et al., 2011), and Cre expression was  
499 induced by tamoxifen (2 mg delivered on two consecutive days) administered by either IP  
500 injection or gavage at P31 (SD = 5.6 days), and at least two weeks before the experiment. Ai32  
501 mice (B6;129S-Gt(ROSA)26Sor<sup>tm32(CAG-COP4\*H134R/EYFP)Hze</sup>/J; Jackson Laboratory #024109,

502 RRID:IMSR\_JAX:024109) express a Cre-dependent channelrhodopsin-2 (ChR2)/enhanced  
503 yellow fluorescent protein (eYFP) fusion protein (Madisen et al., 2012). Mice studied were  
504 heterozygous for the Cre allele and the Ai32 reporter allele.

505 A mouse aged between ~2-4 months was dark adapted for one hour, and following death,  
506 the eye was enucleated and prepared for recording in Ames medium (Sigma) under infrared  
507 light using night-vision goggles connected to a dissection microscope (Park et al., 2015). In the  
508 recording chamber, the retina was perfused (~4-6 ml/min) with warmed (31–34°C),  
509 carbogenated (95% O<sub>2</sub>-5% CO<sub>2</sub>) Ames' medium (light response and optogenetic experiments in  
510 whole-mount retina). The retina was imaged using a custom-built two-photon fluorescence  
511 microscope controlled with ScanImage software [RRID:SCR\_014307 (Borghuis et al., 2013;  
512 Borghuis et al., 2011; Pologruto et al., 2004)]. Fluorescent cells were targeted for whole-cell  
513 patch clamp recording with a Coherent Ultra II laser tuned to 910 nm (Park et al., 2015). For  
514 optogenetic experiments in retinal slices, dissection was performed in normal room light, and  
515 the retina was maintained in artificial CSF as described previously (Jarsky et al., 2010).

516 Electrophysiological measurements were made by whole-cell recordings with patch pipettes  
517 (tip resistance 4-11 MΩ). Membrane current or potential was amplified, digitized at 10-20 kHz,  
518 and stored (MultiClamp 700B amplifier; ITC-18 or Digidata 1440A A-D board) using either  
519 pClamp 10.0 (Molecular Devices) or IGOR Pro software (Wavemetrics). For light-evoked  
520 responses and optogenetic experiments in whole-mount retina, pipettes contained (in mM): 120  
521 Cs-methanesulfonate, 5 TEA-Cl, 10 HEPES, 10 BAPTA, 3 NaCl, 2 QX-314-Cl, 4 ATP-Mg, 0.4  
522 GTP-Na<sub>2</sub>, and 10 phosphocreatine-Tris<sub>2</sub> (pH 7.3, 280 mOsm). For optogenetic experiments in  
523 retinal slices, pipettes contained (in mM): 90 Cs-methanesulfonate, 20 TEA-Cl, 1 4-AP, 10  
524 HEPES, 1 BAPTA, 4 ATP-Mg, 0.4 GTP- Na<sub>2</sub>, and 8 phosphocreatine-Tris<sub>2</sub>.

525 Either Lucifer Yellow (0.05 - 0.1%) or red fluorophores (sulfarhodamine, 10 μM or Alexa 568,  
526 60 μM) were added to the pipette solution for visualizing the cell. All drugs used for  
527 electrophysiology experiments were purchased from Tocris Biosciences, Alomone Laboratories  
528 or Sigma-Aldrich. Excitatory and inhibitory currents were recorded at holding potentials near the  
529 estimated reversal for either Cl<sup>-</sup> (E<sub>Cl</sub>, -67 mV) or cations (E<sub>cation</sub>, +5 mV), after correcting for the  
530 liquid junction potential (-9 mV). Series resistance (~10-80 MΩ) was compensated by up to  
531 50%. Following the recording, an image of the filled cell was acquired using 2PLSM.

532 Light stimuli were presented using a modified video projector [peak output, 397 nm; full-  
533 width-at-half-maximum, 20 nm (Borghuis et al., 2014; Borghuis et al., 2013)] focused onto the  
534 retina through the microscope condenser. Stimuli were presented within a 4 x 3 mm area on the  
535 retina. Stimuli included contrast-reversing spots of variable diameter to measure spatial tuning

536 (Zhang et al., 2012). For some experiments, stimuli were presented with 1-Hz temporal square-  
537 wave modulations (100% Michelson contrast) relative to a background of mean luminance that  
538 evoked  $\sim 10^4$  photoisomerizations ( $R^*$ ) cone $^{-1}$  sec $^{-1}$  (Borghuis et al., 2014). In other experiments,  
539 stimuli were spots of dim light ( $4 - 40 R^*$  rod $^{-1}$  sec $^{-1}$ ) of varying diameter presented on a dark  
540 background.

541  
542 *Optogenetics:* ChR2-mediated responses were recorded in the presence of drugs to block  
543 conventional photoreceptor-mediated light responses. Recordings were made in a cocktail of (in  
544  $\mu$ M): L-AP4 (20); either UBP310 (50) or ACET (1-5); DNQX (50-100); and D-AP5 (50-100) (Park  
545 et al., 2015). ChR2 was activated by a high-power blue LED ( $\lambda_{\text{peak}}$ , 450 or 470 nm; maximum  
546 intensity of  $\sim 5 \times 10^{17}$  photons s $^{-1}$  cm $^{-2}$ ) focused through the condenser onto a square (220  $\mu$ m  
547 per side) area as described previously (Park et al., 2015).

548  
549 *Construction and production of recombinant AAV:* To generate an AAV vector backbone, we  
550 modified two plasmids procured from Addgene (#62724 and #74291). We digested  
551 plasmid #74291 with BamHI, treated with Klenow fragment, digested again with HindIII, and  
552 kept the vector backbone. The insert part of plasmid #62724 was excised by digesting with  
553 EcoRI, treated with Klenow fragment, and digested again with HindIII. The excised fragment  
554 was ligated into the vector backbone from plasmid #74291. Then, we amplified the DTA  
555 sequence by PCR, created KpnI and NheI restriction sites at each end, and subcloned the PCR  
556 products into a newly generated AAV vector. The final construct contained DTA sequence in  
557 reverse orientation surrounded by two nested pairs of incompatible loxP sites (pAAV-CAG-  
558 FLEX-NheI-DTA-KpnI-WPRE-SV40pA). The plasmid carrying DTA was obtained from Addgene  
559 (#13440).

560 Virus production was based on a triple-transfection, helper-free method, and the virus was  
561 purified as described previously (Byun et al., 2019; Park et al., 2015), except that we used a  
562 plasmid carrying AAV2/7m8 capsid (gift from Dr. John Flannery, University of California at  
563 Berkeley). The titer of the purified AAVs was determined by quantitative PCR using primers that  
564 recognize WPRE; the concentrated titers were  $> 10^{13}$  viral genome particles/ml in all  
565 preparations. Viral stocks were stored at  $-80^\circ\text{C}$ .

566  
567 *Histology:* For immunohistochemistry, animals were perfused at age 1-12 weeks. The retinas  
568 were dissected and fixed with 4% paraformaldehyde for 1 h at  $4^\circ\text{C}$ . For whole-mount staining,  
569 retinas were incubated with 6% donkey serum and 0.5% triton X-100 in PBS for 1 h at room

570 temperature; and then incubated with 2% donkey serum and 0.5% triton X-100 in PBS with  
571 primary antibodies for 1–4 days at 4°C, and with secondary antibodies for 1-2 h at room  
572 temperature. For morphological analysis of recorded cells, the retina was fixed for 1 h at room  
573 temperature and reacted as described previously (Manookin et al., 2008).

574 Primary antibodies were used at the following concentrations: goat anti-ChAT (1:200,  
575 Millipore AB144P, RRID: AB\_2079751), rabbit anti-Lucifer Yellow (1:2000, ThermoFisher  
576 Scientific A-5750, RRID: AB\_2536190), rabbit anti-nNOS (1:500, ThermoFisher Scientific 61-  
577 7000, RRID: AB\_2533937), guinea pig anti-nNOS (1:2000, Frontier Institute Af740, RRID:  
578 AB\_2571816), rabbit anti-TH (1:1000, Millipore AB152, RRID: AB\_390204), rabbit anti-  
579 human/rat CRF serum (1:40,000, code #PBL rC68; gift of Dr. Paul Sawchenko, Salk Institute),  
580 guinea pig anti-LHX9 (1:20,000, gift of Dr. Jane Dodd, Columbia University). Rabbit anti-nNOS  
581 was used in all cases of nNOS immunolabeling except for Figure 6F and G, in which case  
582 guinea pig anti-nNOS was used. Secondary antibodies (applied for 2 hours) were conjugated to  
583 Alexa Fluor 488, Cy3 and Cy5 (Jackson ImmunoResearch) and diluted at 1:500.

584  
585 *Confocal imaging:* Confocal imaging was performed using Zeiss laser scanning confocal  
586 microscopes (510, 710, or 800 models). For filled cells, a whole-mount image of the dendritic  
587 tree was acquired using a 20X air objective (NA = 0.8); in some cases, multiple images were  
588 combined as a montage. A high-resolution z-stack of the ChAT bands (i.e., cholinergic starburst  
589 AC processes, labeled by the ChAT antibody) and the filled amacrine or ganglion cell was  
590 obtained to determine their relative depth in the IPL using a 40X oil objective (NA = 1.4).  
591 Analysis of nNOS, Lhx9, CRH and TH antibody labeling was performed either with the 40X oil  
592 objective.

593 **References:**

594

595 Ala-Laurila, P., Greschner, M., Chichilnisky, E.J., and Rieke, F. (2011). Cone photoreceptor  
596 contributions to noise and correlations in the retinal output. *Nature neuroscience* 14, 1309-1316.

597 Ala-Laurila, P., and Rieke, F. (2014). Coincidence detection of single-photon responses in the  
598 inner retina at the sensitivity limit of vision. *Current biology : CB* 24, 2888-2898.

599 Badea, T.C., and Nathans, J. (2004). Quantitative analysis of neuronal morphologies in the  
600 mouse retina visualized by using a genetically directed reporter. *The Journal of comparative*  
601 *neurology* 480, 331-351.

602 Balasubramanian, R., Bui, A., Dong, X., and Gan, L. (2017). Lhx9 Is Required for the  
603 Development of Retinal Nitric Oxide-Synthesizing Amacrine Cell Subtype. *Molecular*  
604 *neurobiology*.

605 Beaudoin, D.L., Kupershtok, M., and Demb, J.B. (2019). Selective synaptic connections in the  
606 retinal pathway for night vision. *The Journal of comparative neurology* 527, 117-132.

607 Beaudoin, D.L., Manookin, M.B., and Demb, J.B. (2008). Distinct expressions of contrast gain  
608 control in parallel synaptic pathways converging on a retinal ganglion cell. *The Journal of*  
609 *physiology* 586, 5487-5502.

610 Bloomfield, S.A., and Xin, D. (2000). Surround inhibition of mammalian All amacrine cells is  
611 generated in the proximal retina. *The Journal of physiology* 523 Pt 3, 771-783.

612 Borghuis, B.G., Looger, L.L., Tomita, S., and Demb, J.B. (2014). Kainate receptors mediate  
613 signaling in both transient and sustained OFF bipolar cell pathways in mouse retina. *J Neurosci*  
614 34, 6128-6139.

615 Borghuis, B.G., Marvin, J.S., Looger, L.L., and Demb, J.B. (2013). Two-photon imaging of  
616 nonlinear glutamate release dynamics at bipolar cell synapses in the mouse retina. *J Neurosci*  
617 33, 10972-10985.

618 Borghuis, B.G., Tian, L., Xu, Y., Nikonov, S.S., Vardi, N., Zemelman, B.V., and Looger, L.L.  
619 (2011). Imaging light responses of targeted neuron populations in the rodent retina. *J Neurosci*  
620 31, 2855-2867.

621 Briggman, K.L., Helmstaedter, M., and Denk, W. (2011). Wiring specificity in the direction-  
622 selectivity circuit of the retina. *Nature* 471, 183-188.

623 Byun, H., Lee, H.-L., Liu, H., Forrest, D., Rudenko, A., and Kim, I.-J. (2019). Ror $\beta$  regulates  
624 selective axon-target innervation in the mammalian midbrain. *Development* 146, dev171926.

625 Chun, M.H., Oh, S.J., Kim, I.B., and Kim, K.Y. (1999). Light and electron microscopical analysis  
626 of nitric oxide synthase-like immunoreactive neurons in the rat retina. *Visual neuroscience* 16,  
627 379-389.

628 Cohen, E., and Sterling, P. (1990). Demonstration of cell types among cone bipolar neurons of  
629 cat retina. *Philos Trans R Soc Lond B Biol Sci* 330, 305-321.

- 630 Contini, M., and Raviola, E. (2003). GABAergic synapses made by a retinal dopaminergic  
631 neuron. *Proceedings of the National Academy of Sciences of the United States of America* *100*,  
632 1358-1363.
- 633 Demb, J.B., and Singer, J.H. (2012). Intrinsic properties and functional circuitry of the All  
634 amacrine cell. *Visual neuroscience* *29*, 51-60.
- 635 Demb, J.B., and Singer, J.H. (2015). Functional Circuitry of the Retina. *Annu Rev Vis Sci* *1*, 16.
- 636 Denk, W., and Horstmann, H. (2004). Serial block-face scanning electron microscopy to  
637 reconstruct three-dimensional tissue nanostructure. *PLoS biology* *2*, e329.
- 638 Ding, H., Smith, R.G., Poleg-Polsky, A., Diamond, J.S., and Briggman, K.L. (2016). Species-  
639 specific wiring for direction selectivity in the mammalian retina. *Nature*.
- 640 Dumitrescu, O.N., Pucci, F.G., Wong, K.Y., and Berson, D.M. (2009). Ectopic retinal ON bipolar  
641 cell synapses in the OFF inner plexiform layer: contacts with dopaminergic amacrine cells and  
642 melanopsin ganglion cells. *The Journal of comparative neurology* *517*, 226-244.
- 643 Dunn, F.A., Doan, T., Sampath, A.P., and Rieke, F. (2006). Controlling the gain of rod-mediated  
644 signals in the Mammalian retina. *J Neurosci* *26*, 3959-3970.
- 645 Dunn, F.A., and Rieke, F. (2008). Single-photon absorptions evoke synaptic depression in the  
646 retina to extend the operational range of rod vision. *Neuron* *57*, 894-904.
- 647 Famiglietti, E.V., Jr., and Kolb, H. (1975). A bistratified amacrine cell and synaptic circuitry in the  
648 inner plexiform layer of the retina. *Brain research* *84*, 293-300.
- 649 Field, G.D., Sampath, A.P., and Rieke, F. (2005). Retinal processing near absolute threshold:  
650 from behavior to mechanism. *Annual review of physiology* *67*, 491-514.
- 651 Graydon, C.W., Lieberman, E.E., Rho, N., Briggman, K.L., Singer, J.H., and Diamond, J.S.  
652 (2018). Synaptic Transfer between Rod and Cone Pathways Mediated by All Amacrine Cells in  
653 the Mouse Retina. *Current biology : CB* *28*, 2739-2751 e2733.
- 654 Grimes, W.N., Baudin, J., Azevedo, A.W., and Rieke, F. (2018a). Range, routing and kinetics of  
655 rod signaling in primate retina. *eLife* *7*.
- 656 Grimes, W.N., Graves, L.R., Summers, M.T., and Rieke, F. (2015). A simple retinal mechanism  
657 contributes to perceptual interactions between rod- and cone-mediated responses in primates.  
658 *eLife* *4*.
- 659 Grimes, W.N., Hoon, M., Briggman, K.L., Wong, R.O., and Rieke, F. (2014a). Cross-synaptic  
660 synchrony and transmission of signal and noise across the mouse retina. *eLife*, e03892.
- 661 Grimes, W.N., Schwartz, G.W., and Rieke, F. (2014b). The synaptic and circuit mechanisms  
662 underlying a change in spatial encoding in the retina. *Neuron* *82*, 460-473.
- 663 Grimes, W.N., Songco-Aguas, A., and Rieke, F. (2018b). Parallel Processing of Rod and Cone  
664 Signals: Retinal Function and Human Perception. *Annu Rev Vis Sci* *4*, 123-141.



- 665 Gustincich, S., Feigenspan, A., Wu, D.K., Koopman, L.J., and Raviola, E. (1997). Control of  
666 dopamine release in the retina: a transgenic approach to neural networks. *Neuron* 18, 723-736.
- 667 Hartveit, E., and Veruki, M.L. (2012). Electrical synapses between All amacrine cells in the  
668 retina: Function and modulation. *Brain research* 1487, 160-172.
- 669 Helmstaedter, M., Briggman, K.L., and Denk, W. (2011). High-accuracy neurite reconstruction  
670 for high-throughput neuroanatomy. *Nature neuroscience* 14, 1081-1088.
- 671 Helmstaedter, M., Briggman, K.L., Turaga, S.C., Jain, V., Seung, H.S., and Denk, W. (2013).  
672 Connectomic reconstruction of the inner plexiform layer in the mouse retina. *Nature* 500, 168-  
673 174.
- 674 Hoggarth, A., McLaughlin, A.J., Ronellenfitch, K., Trenholm, S., Vasandani, R.,  
675 Sethuramanujam, S., Schwab, D., Briggman, K.L., and Awatramani, G.B. (2015). Specific wiring  
676 of distinct amacrine cells in the directionally selective retinal circuit permits independent coding  
677 of direction and size. *Neuron* 86, 276-291.
- 678 Hoshi, H., Liu, W.L., Massey, S.C., and Mills, S.L. (2009). ON inputs to the OFF layer: bipolar  
679 cells that break the stratification rules of the retina. *J Neurosci* 29, 8875-8883.
- 680 Isaacson, J.S., and Strowbridge, B.W. (1998). Olfactory reciprocal synapses: dendritic signaling  
681 in the CNS. *Neuron* 20, 749-761.
- 682 Jacoby, J., Nath, A., Jessen, Z.F., and Schwartz, G.W. (2018). A Self-Regulating Gap Junction  
683 Network of Amacrine Cells Controls Nitric Oxide Release in the Retina. *Neuron* 100, 1149-1162  
684 e1145.
- 685 Jacoby, J., Zhu, Y., DeVries, S.H., and Schwartz, G.W. (2015). An Amacrine Cell Circuit for  
686 Signaling Steady Illumination in the Retina. *Cell reports* 13, 2663-2670.
- 687 Jahr, C.E., and Nicoll, R.A. (1980). Dendrodendritic inhibition: demonstration with intracellular  
688 recording. *Science* 207, 1473-1475.
- 689 Jahr, C.E., and Nicoll, R.A. (1982). An intracellular analysis of dendrodendritic inhibition in the  
690 turtle in vitro olfactory bulb. *The Journal of physiology* 326, 213-234.
- 691 Jarsky, T., Tian, M., and Singer, J.H. (2010). Nanodomain control of exocytosis is responsible  
692 for the signaling capability of a retinal ribbon synapse. *J Neurosci* 30, 11885-11895.
- 693 Ke, J.-B., Wang, Y.V., Borghuis, B.G., Cembrowski, M., Kath, W.L., Rieke, H., Demb, J.B., and  
694 Singer, J.H. (2014). Adaptation to background light enables contrast coding at rod bipolar cell  
695 synapses. *Neuron* 81, 13.
- 696 Kim, H.L., Jeon, J.H., Koo, T.H., Lee, U.Y., Jeong, E., Chun, M.H., Moon, J.I., Massey, S.C.,  
697 and Kim, I.B. (2012). Axonal synapses utilize multiple synaptic ribbons in the mammalian retina.  
698 *PLoS one* 7, e52295.
- 699 Kim, I.B., Lee, E.J., Kim, K.Y., Ju, W.K., Oh, S.J., Joo, C.K., and Chun, M.H. (1999).  
700 Immunocytochemical localization of nitric oxide synthase in the mammalian retina.  
701 *Neuroscience letters* 267, 193-196.



- 702 Kuo, S.P., Schwartz, G.W., and Rieke, F. (2016). Nonlinear Spatiotemporal Integration by  
703 Electrical and Chemical Synapses in the Retina. *Neuron* 90, 320-332.
- 704 Lauritzen, J.S., Anderson, J.R., Jones, B.W., Watt, C.B., Mohammed, S., Hoang, J.V., and  
705 Marc, R.E. (2013). ON cone bipolar cell axonal synapses in the OFF inner plexiform layer of the  
706 rabbit retina. *The Journal of comparative neurology* 521, 977-1000.
- 707 Lauritzen, J.S., Sigulinsky, C.L., Anderson, J.R., Kalloniatis, M., Nelson, N.T., Emrich, D.P.,  
708 Rapp, C., McCarthy, N., Kerzner, E., Meyer, M., *et al.* (2016). Rod-cone crossover connectome  
709 of mammalian bipolar cells. *The Journal of comparative neurology*.
- 710 Lin, B., and Masland, R.H. (2006). Populations of wide-field amacrine cells in the mouse retina.  
711 *The Journal of comparative neurology* 499, 797-809.
- 712 Madisen, L., Mao, T., Koch, H., Zhuo, J.M., Berenyi, A., Fujisawa, S., Hsu, Y.W., Garcia, A.J.,  
713 3rd, Gu, X., Zanella, S., *et al.* (2012). A toolbox of Cre-dependent optogenetic transgenic mice  
714 for light-induced activation and silencing. *Nature neuroscience* 15, 793-802.
- 715 Manookin, M.B., Beaudoin, D.L., Ernst, Z.R., Flagel, L.J., and Demb, J.B. (2008). Disinhibition  
716 combines with excitation to extend the operating range of the OFF visual pathway in daylight. *J*  
717 *Neurosci* 28, 4136-4150.
- 718 Mehta, B., Ke, J.B., Zhang, L., Baden, A.D., Markowitz, A.L., Nayak, S., Briggman, K.L.,  
719 Zenisek, D., and Singer, J.H. (2014). Global Ca<sup>2+</sup> signaling drives ribbon-independent synaptic  
720 transmission at rod bipolar cell synapses. *J Neurosci* 34, 6233-6244.
- 721 Mills, S.L., and Massey, S.C. (1995). Differential properties of two gap junctional pathways  
722 made by All amacrine cells. *Nature* 377, 734-737.
- 723 Mortensen, L.S., Park, S.J., Ke, J.B., Cooper, B.H., Zhang, L., Imig, C., Lowel, S., Reim, K.,  
724 Brose, N., Demb, J.B., *et al.* (2016). Complexin 3 Increases the Fidelity of Signaling in a Retinal  
725 Circuit by Regulating Exocytosis at Ribbon Synapses. *Cell reports*.
- 726 Murphy, G.J., and Rieke, F. (2006). Network variability limits stimulus-evoked spike timing  
727 precision in retinal ganglion cells. *Neuron* 52, 511-524.
- 728 Murphy, G.J., and Rieke, F. (2008). Signals and noise in an inhibitory interneuron diverge to  
729 control activity in nearby retinal ganglion cells. *Nature neuroscience* 11, 318-326.
- 730 Nelson, R. (1982). All amacrine cells quicken time course of rod signals in the cat retina.  
731 *Journal of neurophysiology* 47, 928-947.
- 732 Pallotto, M., Watkins, P.V., Fubara, B., Singer, J.H., and Briggman, K.L. (2015). Extracellular  
733 space preservation aids the connectomic analysis of neural circuits. *eLife* 4.
- 734 Park, S.J., Borghuis, B.G., Rahmani, P., Zeng, Q., Kim, I.J., and Demb, J.B. (2015). Function  
735 and Circuitry of VIP+ Interneurons in the Mouse Retina. *J Neurosci* 35, 10685-10700.
- 736 Park, S.J.H., Pottackal, J., Ke, J.B., Jun, N.Y., Rahmani, P., Kim, I.J., Singer, J.H., and Demb,  
737 J.B. (2018). Convergence and Divergence of CRH Amacrine Cells in Mouse Retinal Circuitry. *J*  
738 *Neurosci* 38, 3753-3766.

- 739 Perez De Sevilla Muller, L., Shelley, J., and Weiler, R. (2007). Displaced amacrine cells of the  
740 mouse retina. *The Journal of comparative neurology* 505, 177-189.
- 741 Pologruto, T.A., Yasuda, R., and Svoboda, K. (2004). Monitoring neural activity and [Ca<sup>2+</sup>] with  
742 genetically encoded Ca<sup>2+</sup> indicators. *J Neurosci* 24, 9572-9579.
- 743 Sabbah, S., Berg, D., Papendorp, C., Briggman, K.L., and Berson, D.M. (2017). A Cre Mouse  
744 Line for Probing Irradiance- and Direction-Encoding Retinal Networks. *eNeuro* 4.
- 745 Schwartz, G.W., Okawa, H., Dunn, F.A., Morgan, J.L., Kerschensteiner, D., Wong, R.O., and  
746 Rieke, F. (2012). The spatial structure of a nonlinear receptive field. *Nature neuroscience* 15,  
747 1572-1580.
- 748 Slaughter, M.M., and Miller, R.F. (1981). 2-amino-4-phosphonobutyric acid: a new  
749 pharmacological tool for retina research. *Science* 211, 182-185.
- 750 Smeds, L., Takeshita, D., Turunen, T., Tiihonen, J., Westo, J., Martyniuk, N., Seppanen, A., and  
751 Ala-Laurila, P. (2019). Paradoxical Rules of Spike Train Decoding Revealed at the Sensitivity  
752 Limit of Vision. *Neuron* 104, 576-587 e511.
- 753 Stabio, M.E., Sabbah, S., Quattrochi, L.E., Ilardi, M.C., Fogerson, P.M., Leyrer, M.L., Kim, M.T.,  
754 Kim, I., Schiel, M., Renna, J.M., *et al.* (2018). The M5 Cell: A Color-Opponent Intrinsically  
755 Photosensitive Retinal Ganglion Cell. *Neuron* 97, 150-163 e154.
- 756 Strettoi, E., Dacheux, R.F., and Raviola, E. (1990). Synaptic connections of rod bipolar cells in  
757 the inner plexiform layer of the rabbit retina. *The Journal of comparative neurology* 295, 449-  
758 466.
- 759 Strettoi, E., Dacheux, R.F., and Raviola, E. (1994). Cone bipolar cells as interneurons in the rod  
760 pathway of the rabbit retina. *The Journal of comparative neurology* 347, 139-149.
- 761 Strettoi, E., Raviola, E., and Dacheux, R.F. (1992). Synaptic connections of the narrow-field,  
762 bistratified rod amacrine cell (All) in the rabbit retina. *The Journal of comparative neurology* 325,  
763 152-168.
- 764 Taniguchi, H., He, M., Wu, P., Kim, S., Paik, R., Sugino, K., Kvitsiani, D., Fu, Y., Lu, J., Lin, Y.,  
765 *et al.* (2011). A resource of Cre driver lines for genetic targeting of GABAergic neurons in  
766 cerebral cortex. *Neuron* 71, 995-1013.
- 767 Tien, N.W., Soto, F., and Kerschensteiner, D. (2017). Homeostatic Plasticity Shapes Cell-Type-  
768 Specific Wiring in the Retina. *Neuron* 94, 656-665 e654.
- 769 Tsukamoto, Y., and Omi, N. (2013). Functional allocation of synaptic contacts in microcircuits  
770 from rods via rod bipolar to all amacrine cells in the mouse retina. *The Journal of comparative*  
771 *neurology*.
- 772 Voigt, T., and Wassle, H. (1987). Dopaminergic innervation of A II amacrine cells in mammalian  
773 retina. *J Neurosci* 7, 4115-4128.
- 774 Xin, D., and Bloomfield, S.A. (1999). Comparison of the responses of All amacrine cells in the  
775 dark- and light-adapted rabbit retina. *Visual neuroscience* 16, 653-665.

- 776 Zhang, Y., Kim, I.J., Sanes, J.R., and Meister, M. (2012). The most numerous ganglion cell type  
777 of the mouse retina is a selective feature detector. *Proceedings of the National Academy of*  
778 *Sciences of the United States of America* *109*, E2391-2398.
- 779 Zhu, Y., Xu, J., Hauswirth, W.W., and DeVries, S.H. (2014). Genetically targeted binary labeling  
780 of retinal neurons. *J Neurosci* *34*, 7845-7861.  
781

782 **Figure Legends:**  
783

784 **Figure 1. The mammalian retinal pathway for night vision**

785 (Ai-Av) In red: the rod bipolar (RB) pathway of mammalian retina. Rods make synapses onto  
786 RBs (Ai), which make synapses onto the AII. (Aii). AIIIs make glycinergic synapses (Aiii) onto the  
787 terminals of some OFF cone bipolar (CB) cells and onto the dendrites of some OFF ganglion  
788 cells (GCs). AIIIs are coupled by electrical synapses to the terminals of ON CBs (Aiv), which  
789 make glutamatergic synapses onto ON GCs (Av).

790 (Bi-Bvi) In blue: rods are coupled electrically to cones by gap junctions (Bi) and cones make  
791 synapses onto ON and OFF CBs (Bii). Depolarization of the ON CB by the cone not only drives  
792 glutamatergic transmission to ON GCs (Biii), it also depolarizes AIIIs via the electrical synapses  
793 (Biv) and thereby elicits glycinergic transmission to OFF GCs and perhaps OFF CBs (Bv).

794 (Ci-Cii) In green: rods make direct chemical synapses onto some types of OFF CB (Ci), which in  
795 turn contact OFF GCs (Cii).

796

797 **Figure 2. An inhibitory surround recorded in mouse AII ACs**

798 (A) All responses to spots of light (10 R\*/rod/s, 1 s duration) with the indicated diameter in  
799 control (Ames' medium) and after applying TTX (1  $\mu$ M). Responses were recorded at holding  
800 potentials ( $V_{\text{hold}}$ ) near  $E_{\text{Cl}}$  (-70 mV; top row) and near  $E_{\text{cat}}$  (+5 mV; bottom row).

801 (B) Difference current at each  $V_{\text{hold}}$  for the 400- $\mu$ m spot (average of  $n = 5$  cells; shaded areas  
802 are  $\pm$ SEM across cells as a function of time).

803 (C) Response amplitude [measured over a 200 ms window: horizontal bars in (A)] to spot of  
804 variable diameter at  $V_{\text{hold}} = E_{\text{Cl}}$  ( $n = 5$  cells). Error bars are  $\pm$ SEM across cells.

805 (D) Amplitude of difference current at  $V_{\text{hold}} = E_{\text{cat}}$  averaged across cells. Conventions as in (C).

806 (E) Left, light flash (dark background, two spot sizes, 4 or 40 R\* / rod / s across cells)-evoked  
807 EPSCs in an ON  $\alpha$  RGC. Under control conditions, the response is smaller for the larger  
808 diameter, illustrating the surround effect, which is blocked by TTX (1  $\mu$ M). Middle, Spot stimuli of  
809 varying diameter (Ames' and TTX) elicit EPSCs; peak response amplitude measured in a time  
810 window (100 – 200 ms; horizontal line at left). Right, ratio of response to large (averaged over  
811 the three largest diameters) and small (chosen as the optimal spot size for each cell in the  
812 control condition) spots. A ratio < 1 indicates a surround effect. The ratio increased significantly  
813 in TTX.

814 (F) Same as (E) for IPSCs in OFF  $\alpha$  RGCs (spot intensity, 4 R\* / rod / s).

815 (G) Same as (F) for OFF  $\delta$  RGCs.

816 **Figure 3. Anatomical characterization of AC axons presynaptic to the All.**

817 (A1) A RB dyad synapse, visualized by TEM. Note the synaptic ribbon (yellow arrow) and the  
818 nearby AC input to the postsynaptic All (orange arrow). (A2) A similar dyad synapse observed  
819 by SBEM. Again, the RB ribbon and AC input to the postsynaptic All are marked with yellow  
820 and orange arrows, respectively. (A3, A4) Orthogonal views of the synapse illustrated in A2  
821 showing the RB dyad (top) and the AC input to the postsynaptic All (bottom). A3 and A4 are  
822 from different sections to illustrate the appearance of both ribbon and AC inputs in the section  
823 orthogonal to A2. This is illustrated schematically by the squares at right.

824 (B) Three Alls, skeletonized and annotated with either RB ribbon synapse locations (B1) or AC  
825 synapse locations (B2). The view is from the side of the volume, representing a transverse  
826 section through the retina. The planes containing ON and OFF SAC dendrites are represented  
827 by gray rectangles. Note that the majority of AC inputs to the All are found in the same IPL  
828 sublaminae as the RB inputs, the vitreal side of the ON SAC dendrites. As well, Alls receive no  
829 synaptic input from ACs in the IPL sublaminae between the ON and OFF SAC dendrites.

830 (C1) Side view of a single All and 21 reconstructed presynaptic neurites with output synapses  
831 annotated. (C2) An en face view, visualized from the GCL, of 3 Alls (black) and 61 presynaptic  
832 axons. Note the preponderance of green circles, indicating synapses to the three reconstructed  
833 Alls and other Alls within the volume. Virtually every synapse that was not made with an All was  
834 onto a RB. We observed two synapses onto these axons. (C3) Side view of a single All and  
835 neurites presynaptic to its soma and proximal dendrites. (C4) An *en face* (from GCL) view of the  
836 same All and neurites. (C5) Segmentation of the RB-All-AC complex. The AC axon is thin, with  
837 occasional large varicosities containing clusters of vesicles. It makes synapses with Alls, usually  
838 quite close to RB  $\odot$ All ribbon synapses. In this example, the All dendritic segment receives 4  
839 ribbon inputs from the axon terminal varicosity of a RB and 1 conventional synaptic input from  
840 an AC. The other synapses made by this AC axon segment also are with Alls. (C6)  
841 Segmentation of an All soma and presynaptic neurites, with presynaptic active zones  
842 annotated. The image is a tilted side view; the orientation axis (lower left) indicates the relative  
843 positions of the IPL and GCL.

844

845 **Figure 4. Anatomical characterization of an AC presynaptic to the All.**

846 (A) Skeletonization and annotation of two ACs (left and right panels) with similar morphologies  
847 and patterns of synaptic connectivity. Note that both cells, viewed from the side, as in a  
848 transverse section through the retina, have similar neurite branching patterns and receive  
849 synaptic input from ACs and from ON CBs on dendrites in the OFF laminae of the IPL, on the

850 outer side of the OFF SAC dendrites (i.e., close to 0% IPL depth; here, SAC dendrites are  
851 represented as gray rectangles).  
852 (B) An en face view (viewed from the GCL; the gray represents the layer of ON SAC dendrites)  
853 of the two ACs illustrated in A. Note that their synaptic inputs and outputs are segregated to  
854 different sections of their processes; the area receiving input is dendritic, and the area making  
855 output is axonal. White arrows indicate areas where dendrites become axons (inputs are  
856 proximal to the arrow, closest to the soma; outputs are distal to the arrow, farther from the  
857 soma).  
858 (C) Side (transverse) view of the retina illustrating an ON SAC (from Ding et al. 2016) and  
859 representative ON CBs pre- (at left) or postsynaptic (at right) to the two ACs illustrated in (A)  
860 and (B). ON CBs were classified based on axon branching pattern and stratification depth  
861 relative to the ON SAC dendrites.  
862 (D) Example en passant ribbon-type synapses in a type 6 ON CB axon. Note three ribbons  
863 clustered together and presynaptic to the same AC process.  
864 (E) Example of RB dyad at which the AC type shown in (A) and (B) replaces the A17 as one of  
865 the two postsynaptic cells (see schematic at right).

866

867 **Figure 5. NOS-1 ACs are spiking ON-center cells that can be distinguished from NOS-2**  
868 **ACs.**

869 (A) Morphology of a NOS-1 AC. Dendrites (thick) and axons (thin) were drawn from confocal  
870 images of a NOS-1 AC filled by Lucifer Yellow during whole-cell recording. Single confocal  
871 sections are shown for the inner/ON and outer/OFF layers of processes for the region indicated  
872 (dashed, boxed region). The cell is bistratified in the region proximal to the cell body; only the  
873 ON-layer processes are shown in the drawing.  
874 (B) Membrane potential recording for the cell in (A). The cell had a baseline firing rate at mean  
875 luminance ( $\sim 10^4$  R\*/cone/s) that modulated above and below baseline during positive and  
876 negative contrast periods, respectively (spot diameter, 600  $\mu\text{m}$ ; 100% contrast).  
877 (C) Population (n = 16 cells) changes in firing rate during positive contrast (ON response) and  
878 negative contrast (OFF response) as a function of spot size (100% contrast). Firing rate was  
879 computed over a 500-ms time window for each contrast. Error bars indicated  $\pm$ SEM across  
880 cells.  
881 (D) Collapsed confocal stack (maximum projection image) of a filled NOS-2 cell.  
882 (E) The NOS-2 cell in (D) responds with depolarization at both positive and negative contrast,  
883 an ON-OFF response (spot diameter, 600  $\mu\text{m}$ ; 100% contrast).



884 (F) Population ( $n = 4$  cells) changes in membrane potential as a function of spot size (measured  
885 over a 100-ms time window). Conventions are the same as in (C).

886 (G) Excitatory and inhibitory current measured in a NOS-1 cell to a spot stimulus (diameter, 400  
887  $\mu\text{m}$ ). After adding L-AP4 (20  $\mu\text{M}$ ) to suppress the ON pathway, the excitatory current is blocked  
888 and the inhibitory current increases and is OFF responding.

889 (H) Current-voltage (I-V) plots for ON and OFF responses for data in (G) averaged across cells  
890 (measured over a 100- to 200-ms time window). Error bars indicate  $\pm\text{SEM}$  across cells.

891 (I) Population change in the OFF inhibitory current after adding L-AP4. Individual cell data are  
892 connected by lines. Population data indicate mean  $\pm\text{SEM}$  across cells.

893 (J) Excitatory current amplitude for a population of NOS-1 cells ( $n = 5$  cells) as a function of spot  
894 diameter (100% contrast; measured over a 100-ms time window). Error bars indicate  $\pm\text{SEM}$   
895 across cells.

896

897 **Figure 6. NOS-expressing ACs in the ganglion cell layer are primarily NOS-1 cells.**

898 (A) Loose-patch spike recording from a region of retina with cells labeled in the nNOS-CreER x  
899 Ai32 mouse. The response to a light flash (800  $\mu\text{m}$ -diameter,  $\sim 10^4$   $\text{R}^*/\text{cone/s}$ ) is shown next to  
900 each soma that was recorded. The majority of cells showed a sustained ON response in the  
901 spike rate during the light flash. In one case, the response differed (\*) and showed a transient  
902 ON-OFF response. The cell at lower right was subsequently studied by whole-cell recording and  
903 was filled with dye; for this cell, the spike response is shown at an expanded scale below the  
904 image.

905 (B-E) P12 retinas (C57/B6 wild-type) stained with antibodies to label NOS and Lhx9 expressing  
906 cells in the GCL. Most NOS-expressing cells showed dim labeling for Lhx9 antibody (arrows). A  
907 well-stained NOS-expressing cell in the center (arrow-head) did not show Lhx9 labeling. Laser  
908 power was increased for Lhx9 imaging, such that fluorescence of strongly-labeled cells was  
909 saturated (\*, example cell), making it easier to visualize weakly-labeled cells. NOS labeling  
910 alone (C) and Lhx9 labeling alone (D).

911 (E) Same as (C) with the image plane shifted to the inner plexiform layer (IPL). The NOS-  
912 expressing cell that lacked Lhx9 expression (arrowhead) had thick dendrites that could be  
913 followed into the IPL, with the characteristic properties and stratification of a NOS-2 cell.

914 (F-G) P12 retina (C57/B6) stained with antibodies to label corticotropin releasing hormone  
915 (CRH) and NOS. NOS-expressing cells do not overlap with CRH-expressing cells. NOS labeling  
916 alone (G). Scale bar in (B) applies to (B) – (G).

917



918 **Figure 7. NOS+ ACs generate the TTX-sensitive receptive field surround of the All.**

919 (A) All responses to spots (diameter indicated; 10 R\*/rod/s, 1 s duration) in control (Ames') and  
920 in TTX (1  $\mu$ M) recorded at  $E_{Cl}$  (-70 mV; top) and near  $E_{cat}$  (+5 mV; bottom) in a nNOS-CreER  
921 retina injected with Cre-dependent DTA virus (AAV-7m8-FLEX-DTA).  
922 (B) Difference current at each  $V_{hold}$  for the 800- $\mu$ m diameter spot (average of  $n = 5$  cells; shaded  
923 areas are  $\pm$ SEM across cells as a function of time).  
924 (C) Spot (variable diameter) response amplitudes [measured over a 200-ms time window,  
925 indicated by horizontal bars in (A)] at  $V_{hold} = E_{Cl}$  ( $n = 5$  cells). Error bars are  $\pm$ SEM across cells.  
926 (D) Difference current amplitude at  $V_{hold} = E_{cat}$  averaged across cells. Same conventions as in  
927 (C). Recordings from control retinas (no DTA virus; from Figure 2) superimposed. Responses to  
928 similar diameter spots were significantly smaller in the DTA group compared to control (one-  
929 tailed t-tests, \*): 80/115- $\mu$ m,  $t = 2.12$ ,  $p = 0.027$ ; 180/210- $\mu$ m,  $t = 3.11$ ,  $p = 0.0041$ ; 285/305- $\mu$ m,  
930  $t = 2.5$ ,  $p = 0.0083$ ; 385/400- $\mu$ m,  $t = 2.56$ ,  $p = 0.012$ .  
931 (D) nNOS immunolabeling in GCL and INL, centered on a region with a recorded All (visible in  
932 some images, marked by \*).  
933 (E) Same format as (D) for ChAT immunolabeling of starburst ACs.  
934 (F) NOS+ cell density over a square region (0.64 x 0.64 mm) centered on a recorded All and  
935 visualized by nNOS immunolabeling: DTA vs. control (Cre-positive with no DTA virus,  $n = 3$ ; or  
936 Cre-negative with DTA virus,  $n = 1$ ). Virus-injected retinas had significantly fewer cells (one-  
937 tailed t-test): GCL,  $t = 7.03$ ,  $p = 6.9 \times 10^{-6}$ ; INL,  $t = 4.46$ ,  $p = 3.9 \times 10^{-4}$ .  
938 (G) Same format as (F) for ChAT immunolabeling. Cell density assessed over a square region  
939 (0.16 x 0.16 mm) centered on a recorded All. Starburst AC density in DTA virus-injected retinas  
940 was no smaller than in controls.

941

942 **Figure 8. NOS-1 cells make synapses with All amacrine cells.**

943 (A) Top/Left, optogenetic stimulation of a ChR2-expressing NOS-1 cell (of  $n = 3$  total) in the  
944 nNOS-CreER::Ai32 retina responded with increased spike firing to blue light ( $n = 12$  trials  
945 overlaid). Response was recorded in whole-mount retina in the presence of drugs to block  
946 photoreceptor-mediated inputs to retinal circuitry: DNQX (50  $\mu$ M), D-AP5 (50  $\mu$ M), L-AP4 (2  
947  $\mu$ M), and ACET (1  $\mu$ M).  
948 Bottom/Left, the optogenetic stimulus evoked IPSCs ( $V_{hold} = E_{cat}$ ) in All ACs ( $n = 9$  cells).  
949 Responses are normalized to the maximum amplitude,  $39 \pm 6$  pA (measured over a 60-70 ms  
950 time window).

951 Right, expanded version of traces at left. The initial spike in the NOS-1 cell occurred a few  
952 milliseconds after optogenetic stimulation (top), followed a few milliseconds later by the onset of  
953 the All IPSCs.  
954 (B) In All ACs recorded under the conditions in (A), inhibitory current (measured over the gray  
955 region) was blocked by the GABA-A receptor antagonist SR95531 (50  $\mu$ M).  
956 (C) Effect of SR95531 in a sample of All ACs (n = 4 cells). Error bars indicate  $\pm$ SEM across  
957 cells.  
958 (D) Same format as (B) with the sodium channel blocker TTX (1  $\mu$ M).  
959 (E) Same format as (C) with TTX (n = 5 cells).  
960 (F) Confocal image of the inner nuclear layer of a retina from the nNOS-creER:: Ai32 mouse. A  
961 tyrosine-hydroxylase (TH) antibody was used to label dopaminergic ACs (arrows), which did not  
962 overlap with Cre-expressing NOS+ ACs.  
963 (G) Same image as (F) without the TH labeling. None of the cells with TH immunolabeling  
964 (arrows) were eYFP+.

965

966 **Figure 9. NOS-1 ACs make synapses with RBs.**

967 At left, recordings from a RB (top) and an All (bottom) in a retinal slice demonstrate that  
968 optogenetic stimulation of cre-expressing cells in the nNOS-CreER::Ai32 retina evoked  
969 inhibitory currents ( $V_{\text{hold}} = E_{\text{cat}}$ ). Potentiation of presynaptic depolarization with K channel  
970 blockers was necessary to elicit responses in RBs owing to the small number of presynaptic  
971 axons preserved in the 200- $\mu$ m thin slice. At right, K channel blockers potentiate larger inhibitory  
972 currents ( $V_{\text{hold}} = E_{\text{cat}}$ ) recorded in an All and evoked by optogenetic stimulation of cre-expressing  
973 cells in a whole-mount preparation of nNOS-CreER::Ai32 retina.

974

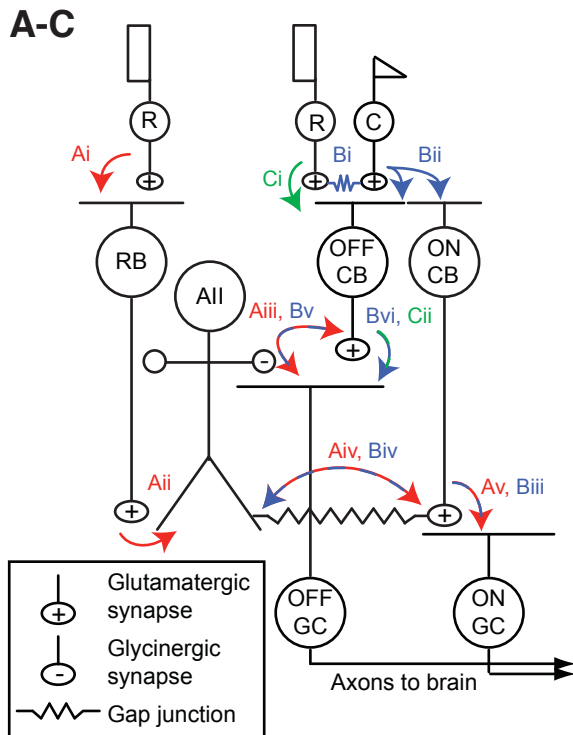

**Figure 1. The mammalian retinal pathway for night vision.**

(Ai-Av) In red: the rod bipolar (RB) pathway of mammalian retina. Rods make synapses onto RBs (Ai), which make synapses onto the All. (Aii). Alls make glycinergic synapses (Aiii) onto the terminals of some OFF cone bipolar (CB) cells and onto the dendrites of some OFF ganglion cells (GCs). Alls are coupled by electrical synapses to the terminals of ON CBs (Aiv), which make glutamatergic synapses onto ON GCs (Av). (Bi-Bvi) In blue: rods are coupled electrically to cones by gap junctions (Bi) and cones make synapses onto ON and OFF CBs (Bii). Depolarization of the ON CB by the cone not only drives glutamatergic transmission to ON GCs (Biii), it also depolarizes Alls via the electrical synapses (Biv) and thereby elicits glycinergic transmission to OFF GCs and perhaps OFF CBs (Bv). (Ci-Cii) In green: rods make direct chemical synapses onto some types of OFF CB (Ci), which in turn contact OFF GCs (Cii).

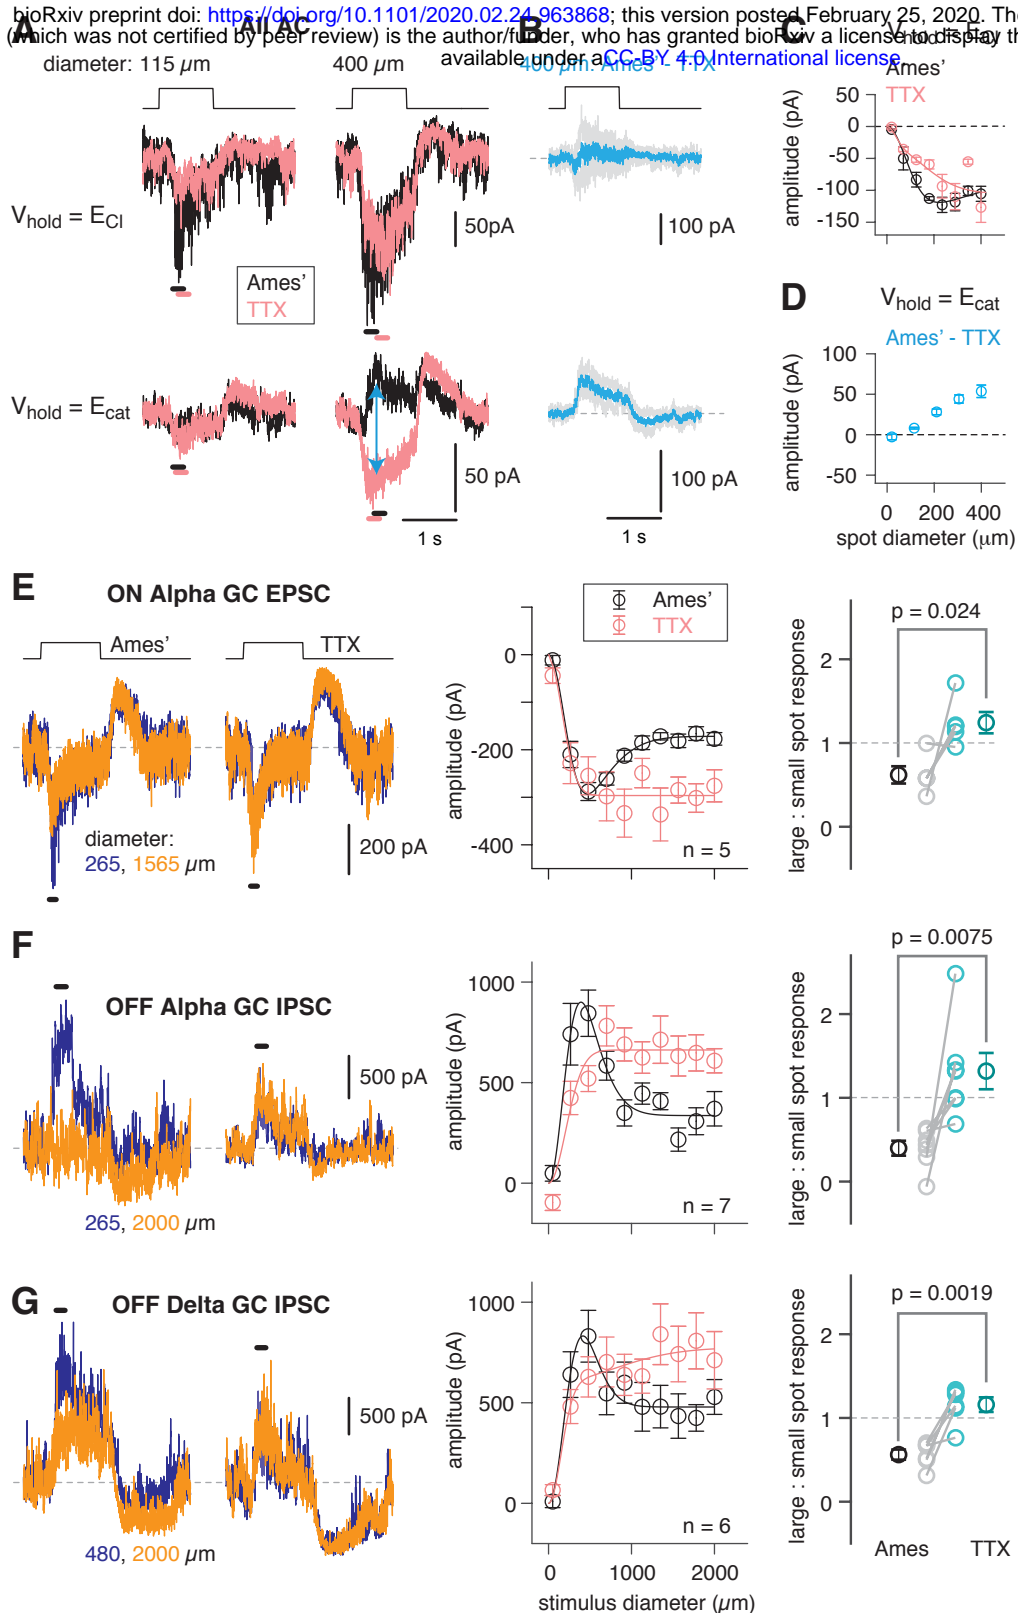

**Figure 2. An inhibitory surround recorded in mouse All ACs.**

(A) All responses to spots of light (10 R\*/rod/s, 1 s duration) with the indicated diameter in control (Ames' medium) and after applying TTX (1 μM). Responses were recorded at holding potentials ( $V_{\text{hold}}$ ) near  $E_{\text{Cl}}$  (-70 mV; top row) and near  $E_{\text{cat}}$  (+5 mV; bottom row). (B) Difference current at each  $V_{\text{hold}}$  for the 400- $\mu\text{m}$  spot (average of  $n = 5$  cells; shaded areas are  $\pm$ SEM across cells as a function of time). (C) Response amplitude [measured over a 200 ms window: horizontal bars in (A)] to spot of variable diameter at  $V_{\text{hold}} = E_{\text{Cl}}$  ( $n = 5$  cells). Error bars are  $\pm$ SEM across cells. (D) Amplitude of difference current at  $V_{\text{hold}} = E_{\text{cat}}$  averaged across cells. Conventions as in (C). (E) Left, light flash (dark background, two spot sizes, 4 or 40 R\* / rod / s across cells)-evoked EPSCs in an ON  $\alpha$  RGC. Under control conditions, the response is smaller for the larger diameter, illustrating the surround effect, which is blocked by TTX (1 μM). Middle, Spot stimuli of varying diameter (Ames' and TTX) elicit EPSCs; peak response amplitude measured in a time window (100 – 200 ms; horizontal line at left). Right, ratio of response to large (averaged over the three largest diameters) and small (chosen as the optimal spot size for each cell in the control condition) spots. A ratio < 1 indicates a surround effect. The ratio increased significantly in TTX. (F) Same as (E) for IPSCs in OFF  $\alpha$  RGCs (spot intensity, 4 R\* / rod / s). (G) Same as (F) for OFF  $\delta$  RGCs.



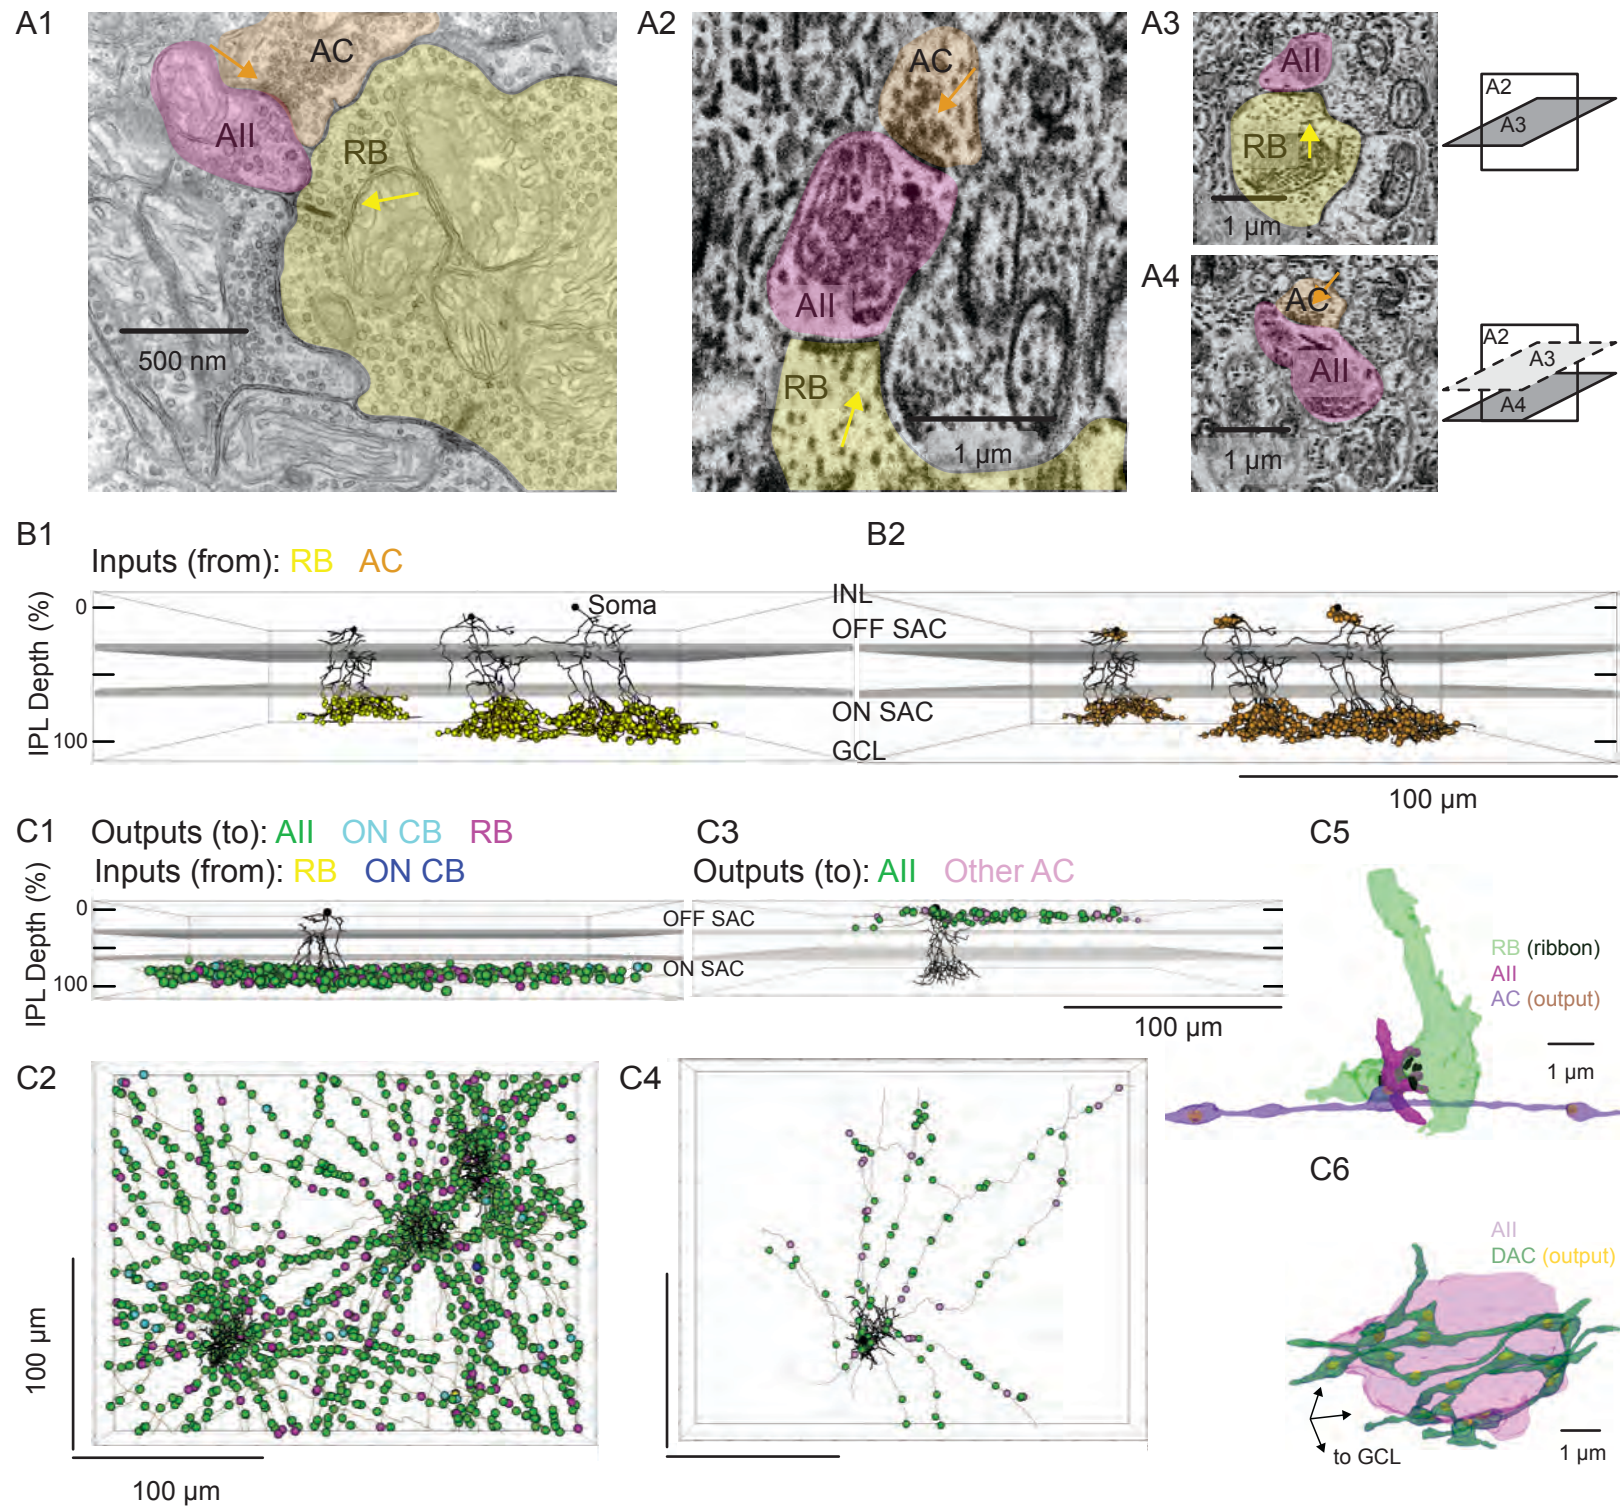

**Figure 3. Anatomical characterization of AC axons presynaptic to the AII.**

(A1) A RB dyad synapse, visualized by TEM. Note the synaptic ribbon (yellow arrow) and the nearby AC input to the postsynaptic AII (orange arrow). (A2) A similar dyad synapse observed by SBEM. Again, the RB ribbon and AC input to the postsynaptic AII are marked with yellow and orange arrows, respectively. (A3, A4) Orthogonal views of the synapse illustrated in A2 showing the RB dyad (top) and the AC input to the postsynaptic AII (bottom). A3 and A4 are from different sections to illustrate the appearance of both ribbon and AC inputs in the section orthogonal to A2. This is illustrated schematically by the squares at right.

(B) Three AIIIs, skeletonized and annotated with either RB ribbon synapse locations (B1) or AC synapse locations (B2). The view is from the side of the volume, representing a transverse section through the retina. The planes containing ON and OFF SAC dendrites are represented by gray rectangles. Note that the majority of AC inputs to the AII are found in the same IPL sublaminae as the RB inputs, the vitreal side of the ON SAC dendrites. As well, AIIIs receive no synaptic input from ACs in the IPL sublaminae between the ON and OFF SAC dendrites. (C1) Side view of a single AII and 21 reconstructed presynaptic neurites with output synapses annotated. (C2) An en face view, visualized from the GCL, of 3 AIIIs (black) and 61 presynaptic axons. Note the preponderance of green circles, indicating synapses to the three reconstructed AIIIs and other AIIIs within the volume. Virtually every synapse that was not made with an AII was onto a RB. We observed two synapses onto these axons. (C3) Side view of a single AII and neurites presynaptic to its soma and proximal dendrites. (C4) An en face (from GCL) view of the same AII and neurites. (C5) Segmentation of the RB-AII-AC complex. The AC axon is thin, with occasional large varicosities containing clusters of vesicles. It makes synapses with AIIIs, usually quite close to RB $\rightarrow$ AII ribbon synapses. In this example, the AII dendritic segment receives 4 ribbon inputs from the axon terminal varicosity of a RB and 1 conventional synaptic input from an AC. The other synapses made by this AC axon segment also are with AIIIs. (C6) Segmentation of an AII soma and presynaptic neurites, with presynaptic active zones annotated. The image is a tilted side view; the orientation axis (lower left) indicates the relative positions of the IPL and GCL.



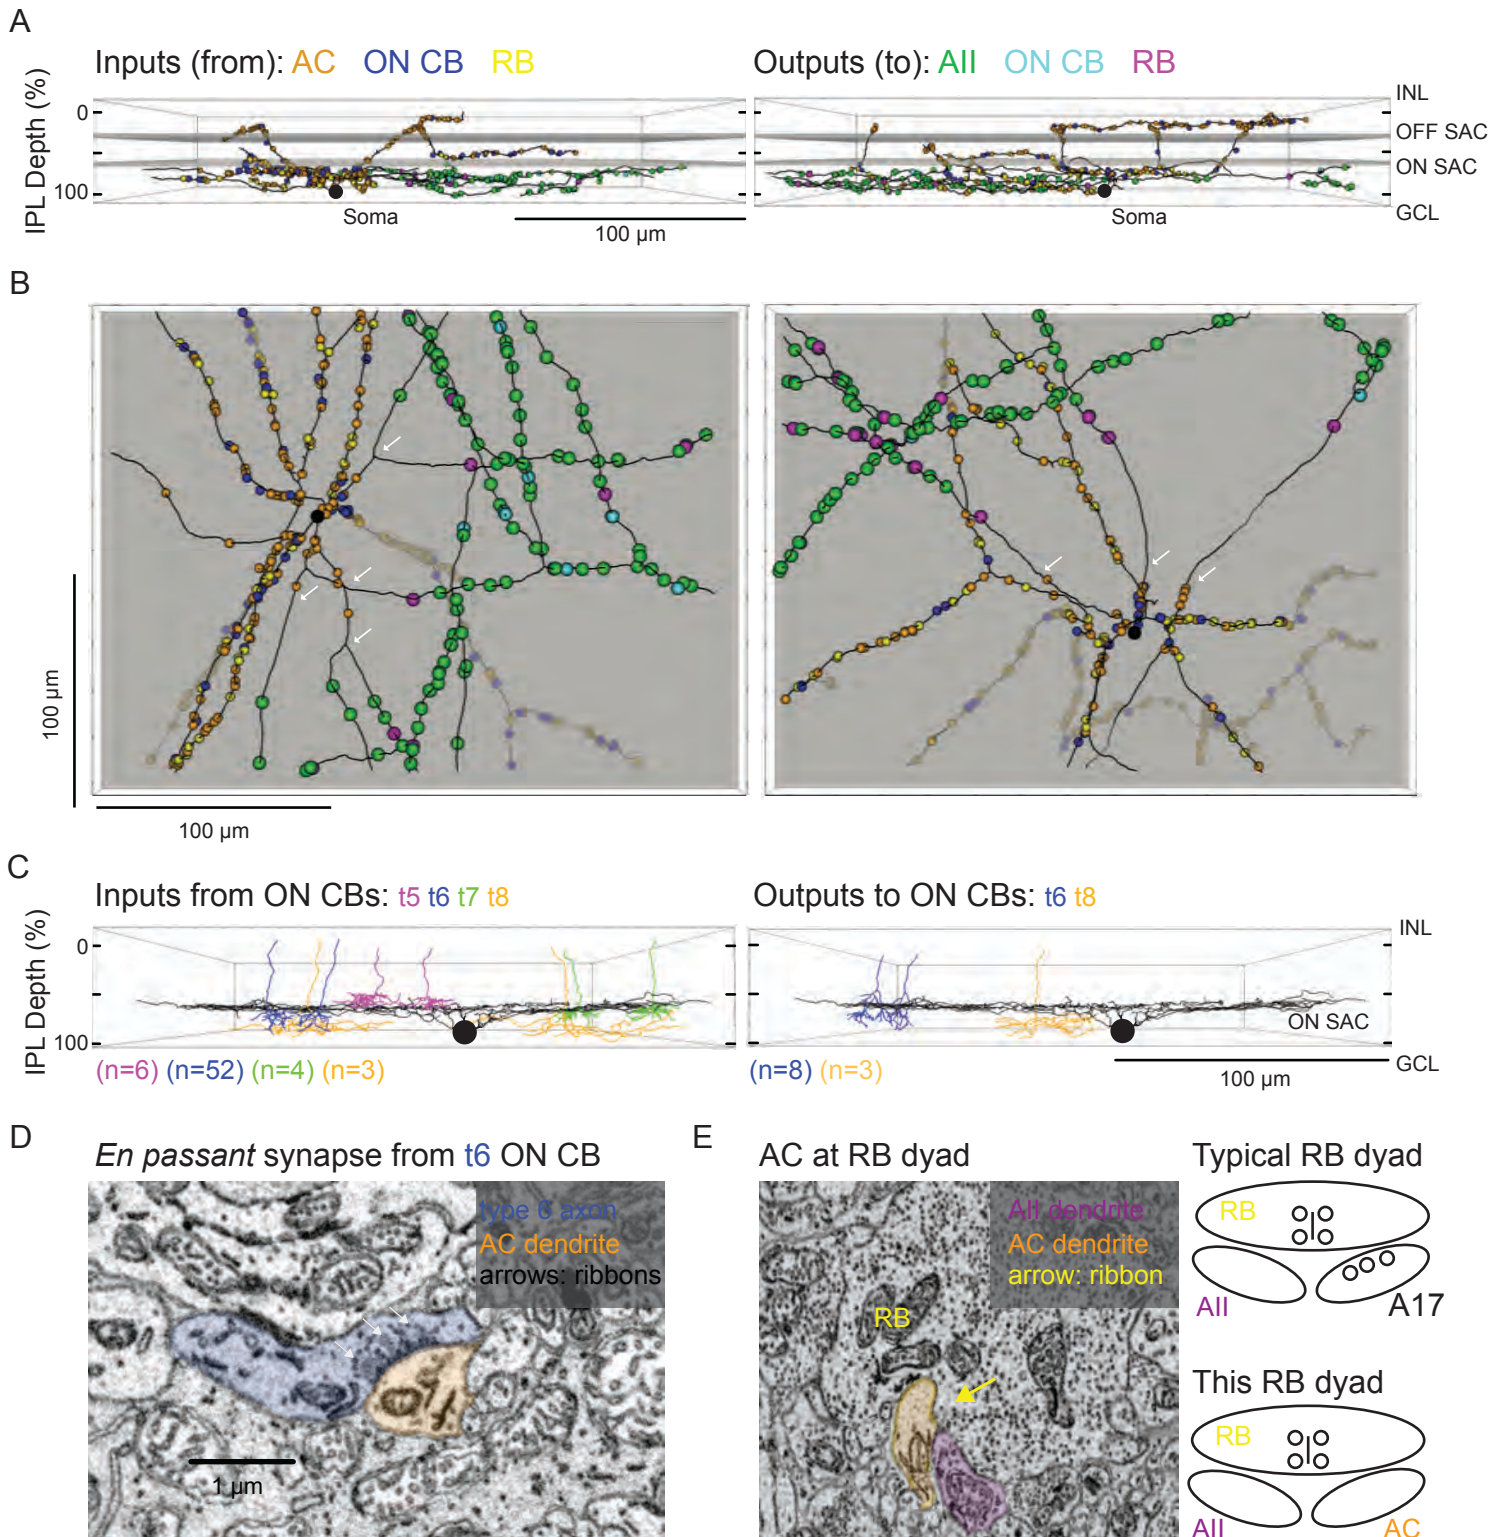

## Figure 4. Anatomical characterization of an AC presynaptic to the All.

(A) Skeletonization and annotation of two ACs (left and right panels) with similar morphologies and patterns of synaptic connectivity. Note that both cells, viewed from the side, as in a transverse section through the retina, have similar neurite branching patterns and receive synaptic input from ACs and from ON CBs on dendrites in the OFF laminae of the IPL, on the outer side of the OFF SAC dendrites (i.e., close to 0% IPL depth; here, SAC dendrites are represented as gray rectangles). (B) An en face view (viewed from the GCL; the gray represents the layer of ON SAC dendrites) of the two ACs illustrated in A. Note that their synaptic inputs and outputs are segregated to different sections of their processes; the area receiving input is dendritic, and the area making output is axonal. White arrows indicate areas where dendrites become axons (inputs are proximal to the arrow, closest to the soma; outputs are distal to the arrow, farther from the soma). (C) Side (transverse) view of the retina illustrating an ON SAC (from Ding et al. 2016) and representative ON CBs pre- (at left) or postsynaptic (at right) to the two ACs illustrated in (A) and (B). ON CBs were classified based on axon branching pattern and stratification depth relative to the ON SAC dendrites. (D) Example en passant ribbon-type synapses in a type 6 ON CB axon. Note three ribbons clustered together and presynaptic to the same AC process. (E) Example of RB dyad at which the AC type shown in (A) and (B) replaces the A17 as one of the two postsynaptic cells (see schematic at right).

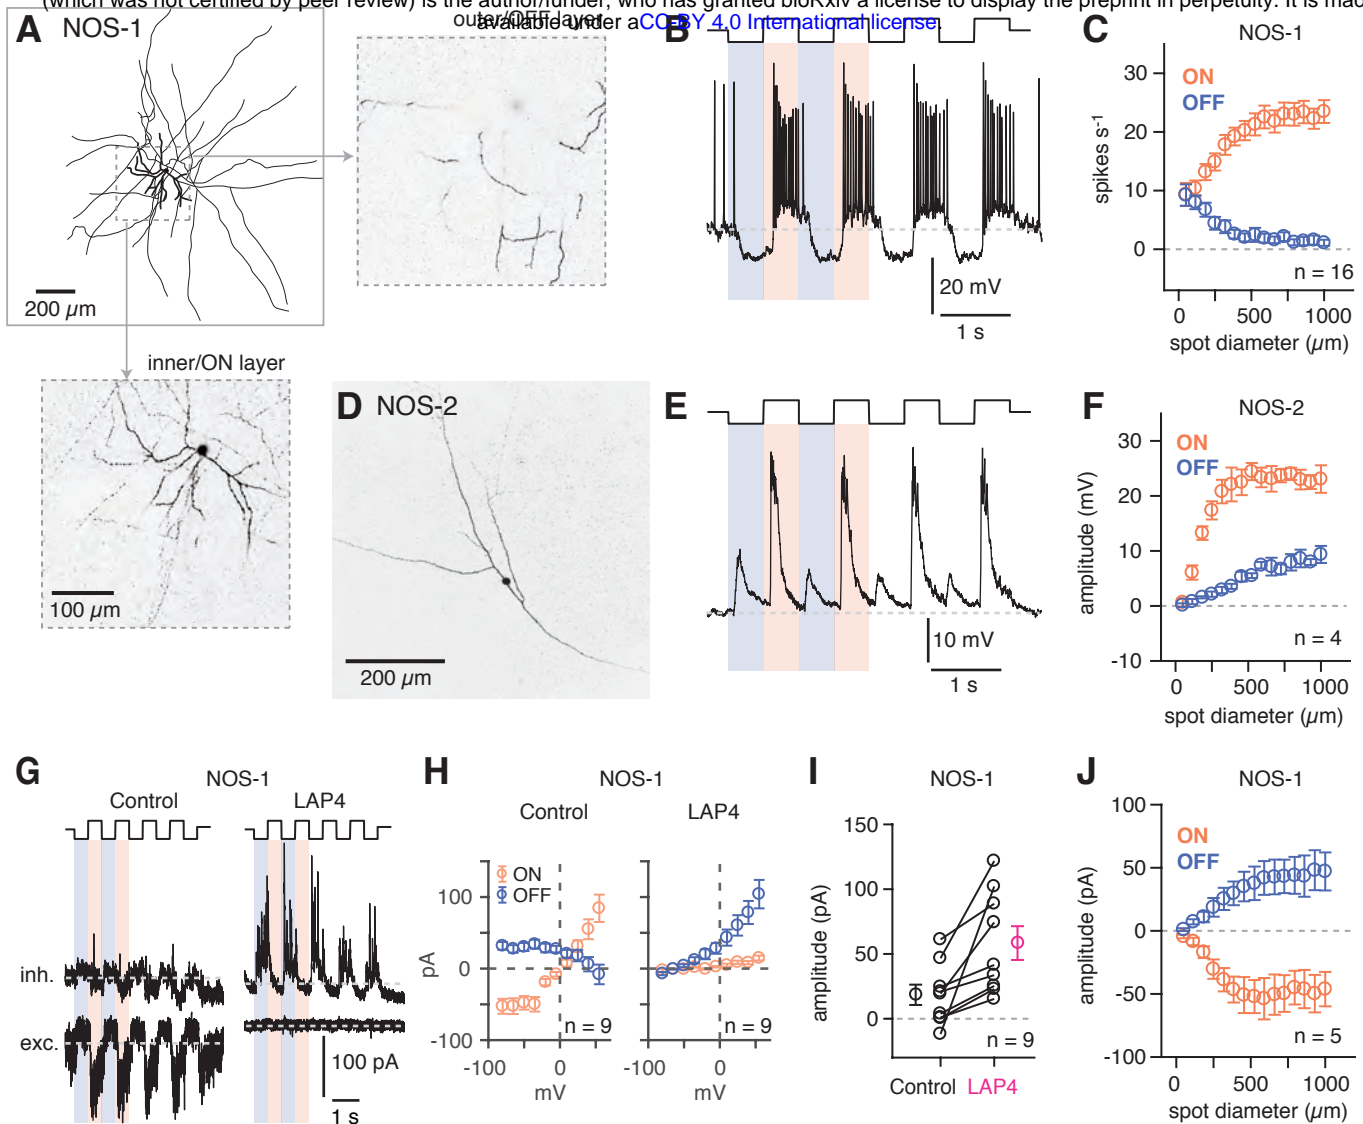

**Figure 5. NOS-1 amacrine cells are spiking ON-center cells that can be distinguished from NOS-2 cells.**

(A) Morphology of a NOS-1 AC. Dendrites (thick) and axons (thin) were drawn from confocal images of a NOS-1 AC filled by Lucifer Yellow during whole-cell recording. Single confocal sections are shown for the inner/ON and outer/OFF layers of processes for the region indicated (dashed, boxed region). The cell is bistratified in the region proximal to the cell body; only the ON-layer processes are shown in the drawing. (B) Membrane potential recording for the cell in (A). The cell had a baseline firing rate at mean luminance ( $\sim 104 R^*/\text{cone/s}$ ) that modulated above and below baseline during positive and negative contrast periods, respectively (spot diameter,  $600 \mu\text{m}$ ; 100% contrast). (C) Population ( $n = 16$  cells) changes in firing rate during positive contrast (ON response) and negative contrast (OFF response) as a function of spot size (100% contrast). Firing rate was computed over a 500-ms time window for each contrast. Error bars indicated  $\pm$ SEM across cells. (D) Collapsed confocal stack (maximum projection image) of a filled NOS-2 cell. (E) The NOS-2 cell in (D) responds with depolarization at both positive and negative contrast, an ON-OFF response (spot diameter,  $600 \mu\text{m}$ ; 100% contrast). (F) Population ( $n = 4$  cells) changes in membrane potential as a function of spot size (measured over a 100-ms time window). Conventions are the same as in (C). (G) Excitatory and inhibitory current measured in a NOS-1 cell to a spot stimulus (diameter,  $400 \mu\text{m}$ ). After adding L-AP4 ( $20 \mu\text{M}$ ) to suppress the ON pathway, the excitatory current is blocked and the inhibitory current increases and is OFF responding. (H) Current-voltage (I-V) plots for ON and OFF responses for data in (G) averaged across cells (measured over a 100 to 200-ms time window). Error bars indicate  $\pm$ SEM across cells. (I) Population change in the OFF inhibitory current after adding L-AP4. Individual cell data are connected by lines. Population data indicate mean  $\pm$ SEM across cells. (J) Excitatory current amplitude for a population of NOS-1 cells ( $n = 5$  cells) as a function of spot diameter (100% contrast; measured over a 100-ms time window). Error bars indicate  $\pm$ SEM across cells.



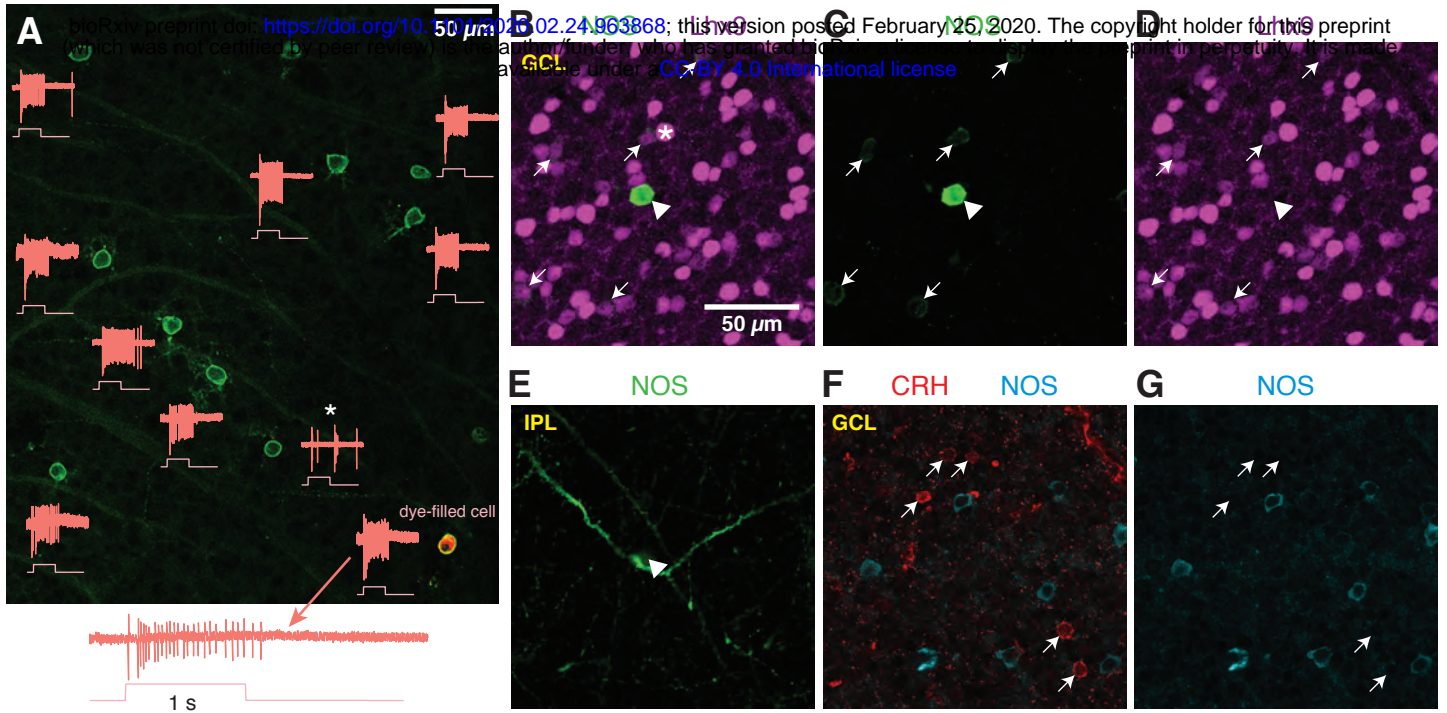

## Figure 6. NOS-expressing ACs in the ganglion cell layer are primarily NOS-1 cells.

(A) Loose-patch spike recording from a region of retina with cells labeled in the nNOS-CreER x Ai32 mouse. The response to a light flash (800  $\mu\text{m}$ -diameter,  $\sim 104 \text{ R}^*/\text{cone/s}$ ) is shown next to each soma that was recorded. The majority of cells showed a sustained ON response in the spike rate during the light flash. In one case, the response differed (\*) and showed a transient ON-OFF response. The cell at lower right was subsequently studied by whole-cell recording and was filled with dye; for this cell, the spike response is shown at an expanded scale below the image. (B-E) P12 retinas (C57/B6 wild-type) stained with antibodies to label NOS and Lhx9 expressing cells in the GCL. Most NOS-expressing cells showed dim labeling for Lhx9 antibody (arrows). A well-stained NOS-expressing cell in the center (arrow-head) did not show Lhx9 labeling. Laser power was increased for Lhx9 imaging, such that fluorescence of strongly-labeled cells was saturated (\*, example cell), making it easier to visualize weakly-labeled cells. NOS labeling alone (C) and Lhx9 labeling alone (D). (E) Same as (C) with the image plane shifted to the inner plexiform layer (IPL). The NOS-expressing cell that lacked Lhx9 expression (arrowhead) had thick dendrites that could be followed into the IPL, with the characteristic properties and stratification of a NOS-2 cell. (F-G) P12 retina (C57/B6) stained with antibodies to label corticotropin releasing hormone (CRH) and NOS. NOS-expressing cells do not overlap with CRH-expressing cells. NOS labeling alone (G). Scale bar in (B) applies to (B) – (G).

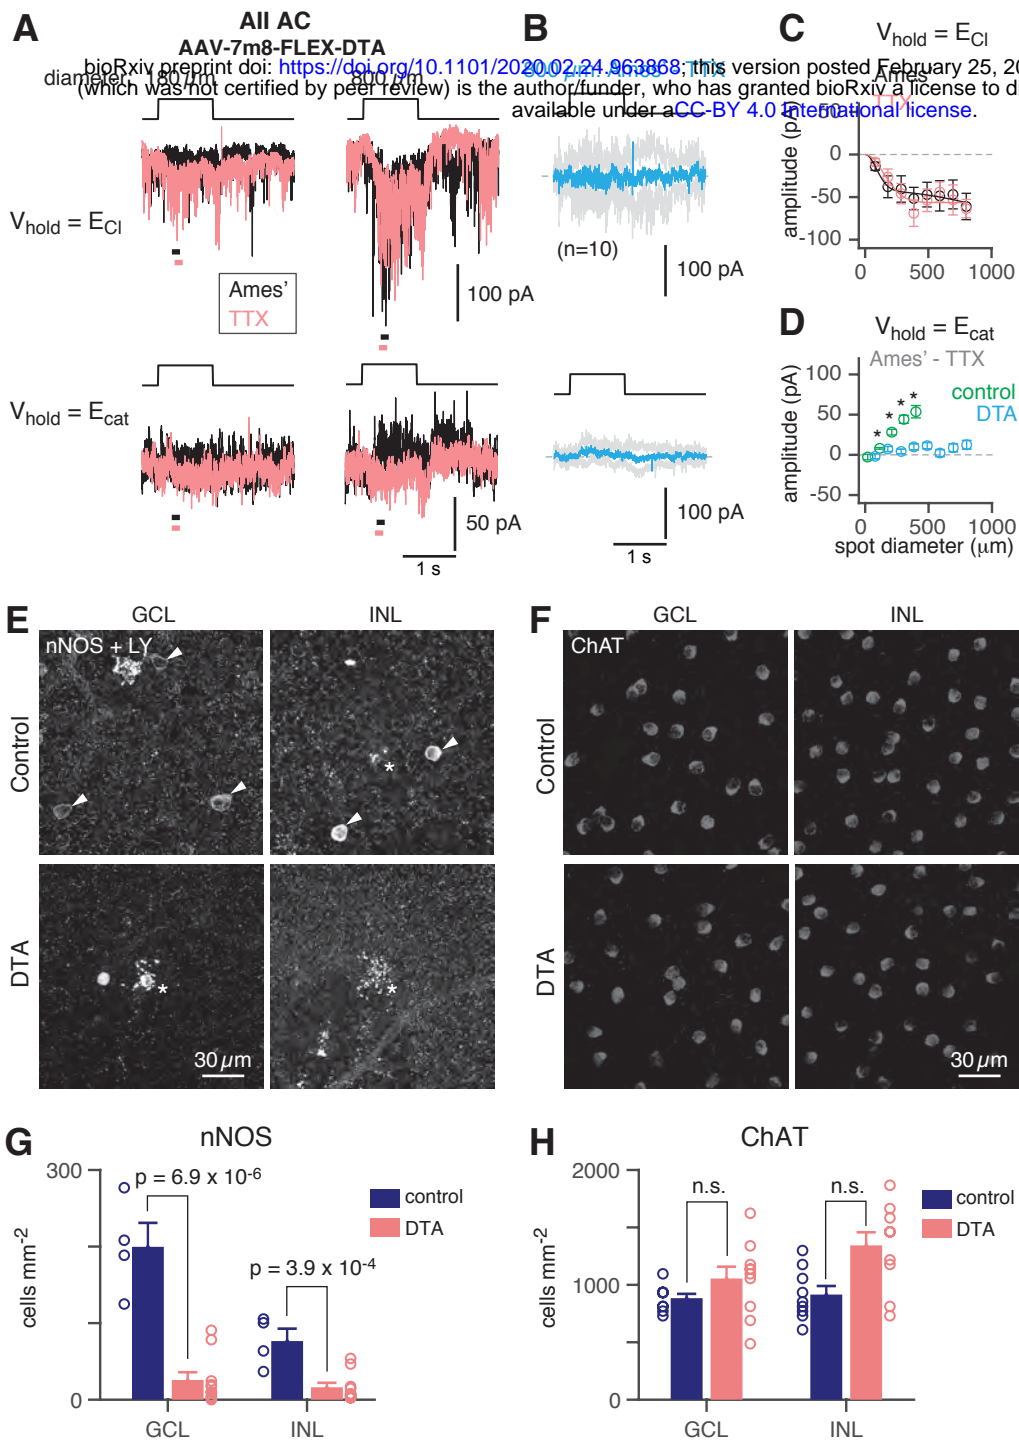

**Figure 7. NOS+ ACs generate the TTX-sensitive receptive field surround of the AII.**

(A) All responses to spots (diameter indicated; 10 R\*/rod/s, 1 s duration) in control (Ames') and in TTX (1  $\mu$ M) recorded at  $E_{Cl}$  (-70 mV; top) and near  $E_{cat}$  (+5 mV; bottom) in a nNOS-CreER retina injected with Cre-dependent DTA virus (AAV-7m8-FLEX-DTA). (B) Difference current at each  $V_{hold}$  for the 800- $\mu$ m diameter spot (average of  $n = 5$  cells; shaded areas are  $\pm$ SEM across cells as a function of time). (C) Spot (variable diameter) response amplitudes [measured over a 200-ms time window, indicated by horizontal bars in (A)] at  $V_{hold} = E_{Cl}$  ( $n = 5$  cells). Error bars are  $\pm$ SEM across cells. (D) Difference current amplitude at  $V_{hold} = E_{cat}$  averaged across cells. Same conventions as in (C). Recordings from control retinas (no DTA virus; from Figure 2) superimposed. Responses to similar diameter spots were significantly smaller in the DTA group compared to control (one-tailed t-tests, \*): 80/115- $\mu$ m,  $t = 2.12$ ,  $p = 0.027$ ; 180/210- $\mu$ m,  $t = 3.11$ ,  $p = 0.0041$ ; 285/305- $\mu$ m,  $t = 2.5$ ,  $p = 0.0083$ ; 385/400- $\mu$ m,  $t = 2.56$ ,  $p = 0.012$ . (E) nNOS immunolabeling in GCL and INL, centered on a region with a recorded AII (visible in some images, marked by \*). (F) Same format as (E) for ChAT immunolabeling of starburst ACs. (G) NOS+ cell density over a square region (0.64 x 0.64 mm) centered on a recorded AII and visualized by nNOS immunolabeling: DTA vs. control (Cre-positive with no DTA virus,  $n = 3$ ; or Cre-negative with DTA virus,  $n = 1$ ). Virus-injected retinas had significantly fewer cells (one-tailed t-test): GCL,  $t = 7.03$ ,  $p = 6.9 \times 10^{-6}$ ; INL,  $t = 4.46$ ,  $p = 3.9 \times 10^{-4}$ . (H) Same format as (F) for ChAT immunolabeling. Cell density assessed over a square region (0.16 x 0.16 mm) centered on a recorded AII. Starburst AC density in DTA virus-injected retinas was no smaller than in controls.

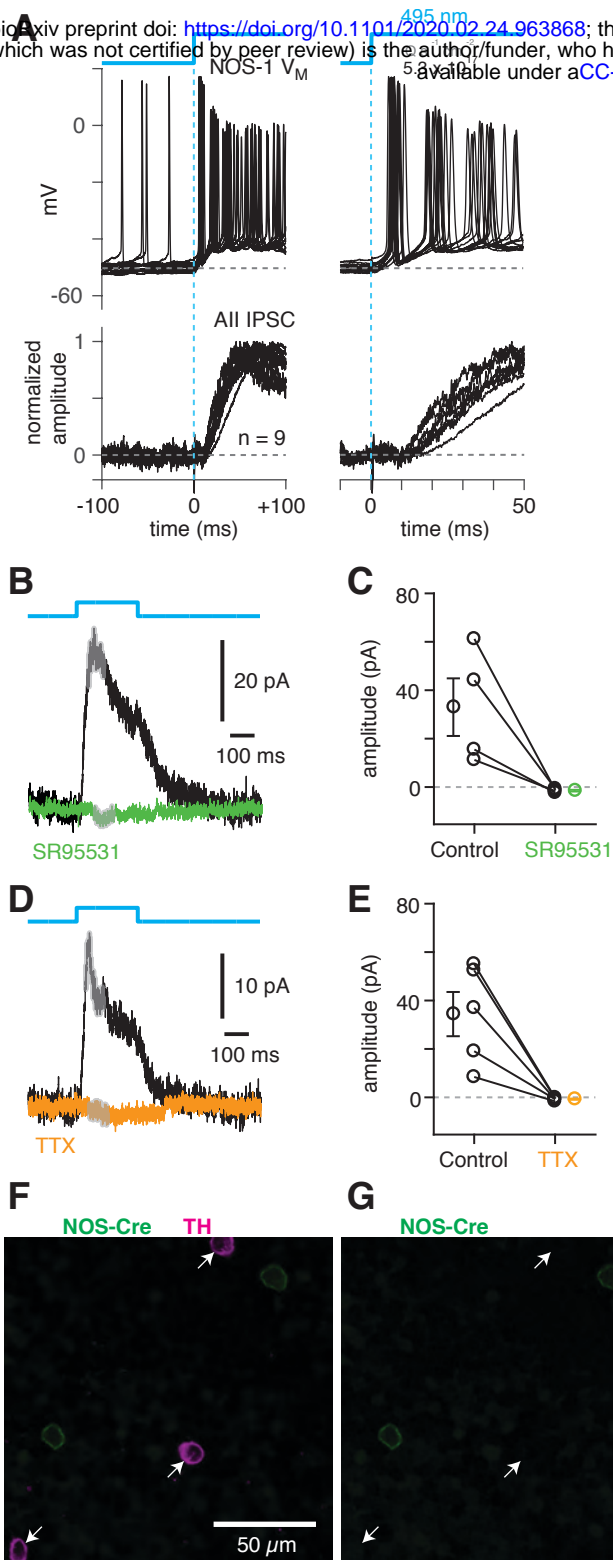

## Figure 8. NOS-1 cells make synapses with All amacrine cells.

(A) Top/Left, optogenetic stimulation of a Chr2-expressing NOS-1 cell (of n = 3 total) in the nNOS-CreER::Ai32 retina responded with increased spike firing to blue light (n = 12 trials overlaid). Response was recorded in whole-mount retina in the presence of drugs to block photoreceptor-mediated inputs to retinal circuitry: DNQX (50  $\mu$ M), D-AP5 (50  $\mu$ M), L-AP4 (2  $\mu$ M), and ACET (1  $\mu$ M). Bottom/Left, the optogenetic stimulus evoked IPSCs (Vhold = Ecet); in All ACs (n = 9 cells). Responses are normalized to the maximum amplitude,  $39 \pm 6$  pA (measured over a 60-70 ms time window).

Right, expanded version of traces at left. The initial spike in the NOS-1 cell occurred a few milliseconds after optogenetic stimulation top), followed a few milliseconds later by the onset of the All IPSCs. (B) In All ACs recorded under the conditions in (A), inhibitory current (measured over the gray region) was blocked by the GABA-A receptor antagonist SR95531 (50  $\mu$ M). (C) Effect of SR95531 in a sample of All ACs (n = 4 cells). Error bars indicate  $\pm$ SEM across cells. (D) Same format as (B) with the sodium channel blocker TTX (1  $\mu$ M). (E) Same format as (C) with TTX (n = 5 cells). (F) Confocal image of the inner nuclear layer of a retina from the nNOS-creER::Ai32 mouse. A tyrosine-hydroxylase (TH) antibody was used to label dopaminergic ACs (arrows), which did not overlap with Cre-expressing NOS+ ACs. (G) Same image as (F) without the TH labeling. None of the cells with TH immunolabeling (arrows) were eYFP+.

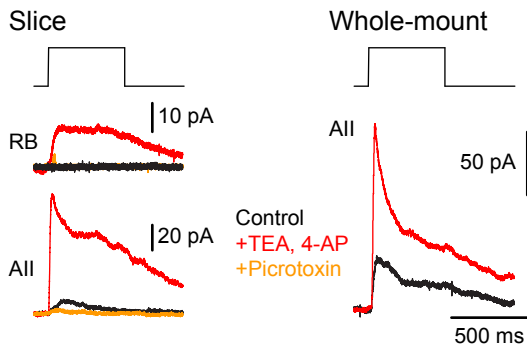

**Figure 9. NOS-1 cells make synapses with RBs.** At left, recordings from a RB (top) and an AII (bottom) in a retinal slice demonstrate that optogenetic stimulation of cre-expressing cells in the nNOS-CreER::Ai32 retina evoked inhibitory currents ( $V_{\text{hold}} = E_{\text{cat}}$ ). Potentiation of presynaptic depolarization with K channel blockers was necessary to elicit responses in RBs owing to the small number of presynaptic axons preserved in the 200  $\mu\text{m}$  thin slice. At right, K channel blockers potentiate larger inhibitory currents ( $V_{\text{hold}} = E_{\text{cat}}$ ) recorded in an AII and evoked by optogenetic stimulation of cre-expressing cells in a whole-mount preparation of nNOS-CreER::Ai32 retina.
